# Supplementary material
Source: ML conference proceedings conference paper supplement (https://openreview.net/forum?id=spdYeZG3zT)

# GEMMA\_1B - ATTN Layer Analysis

## Comparison of KL Divergence

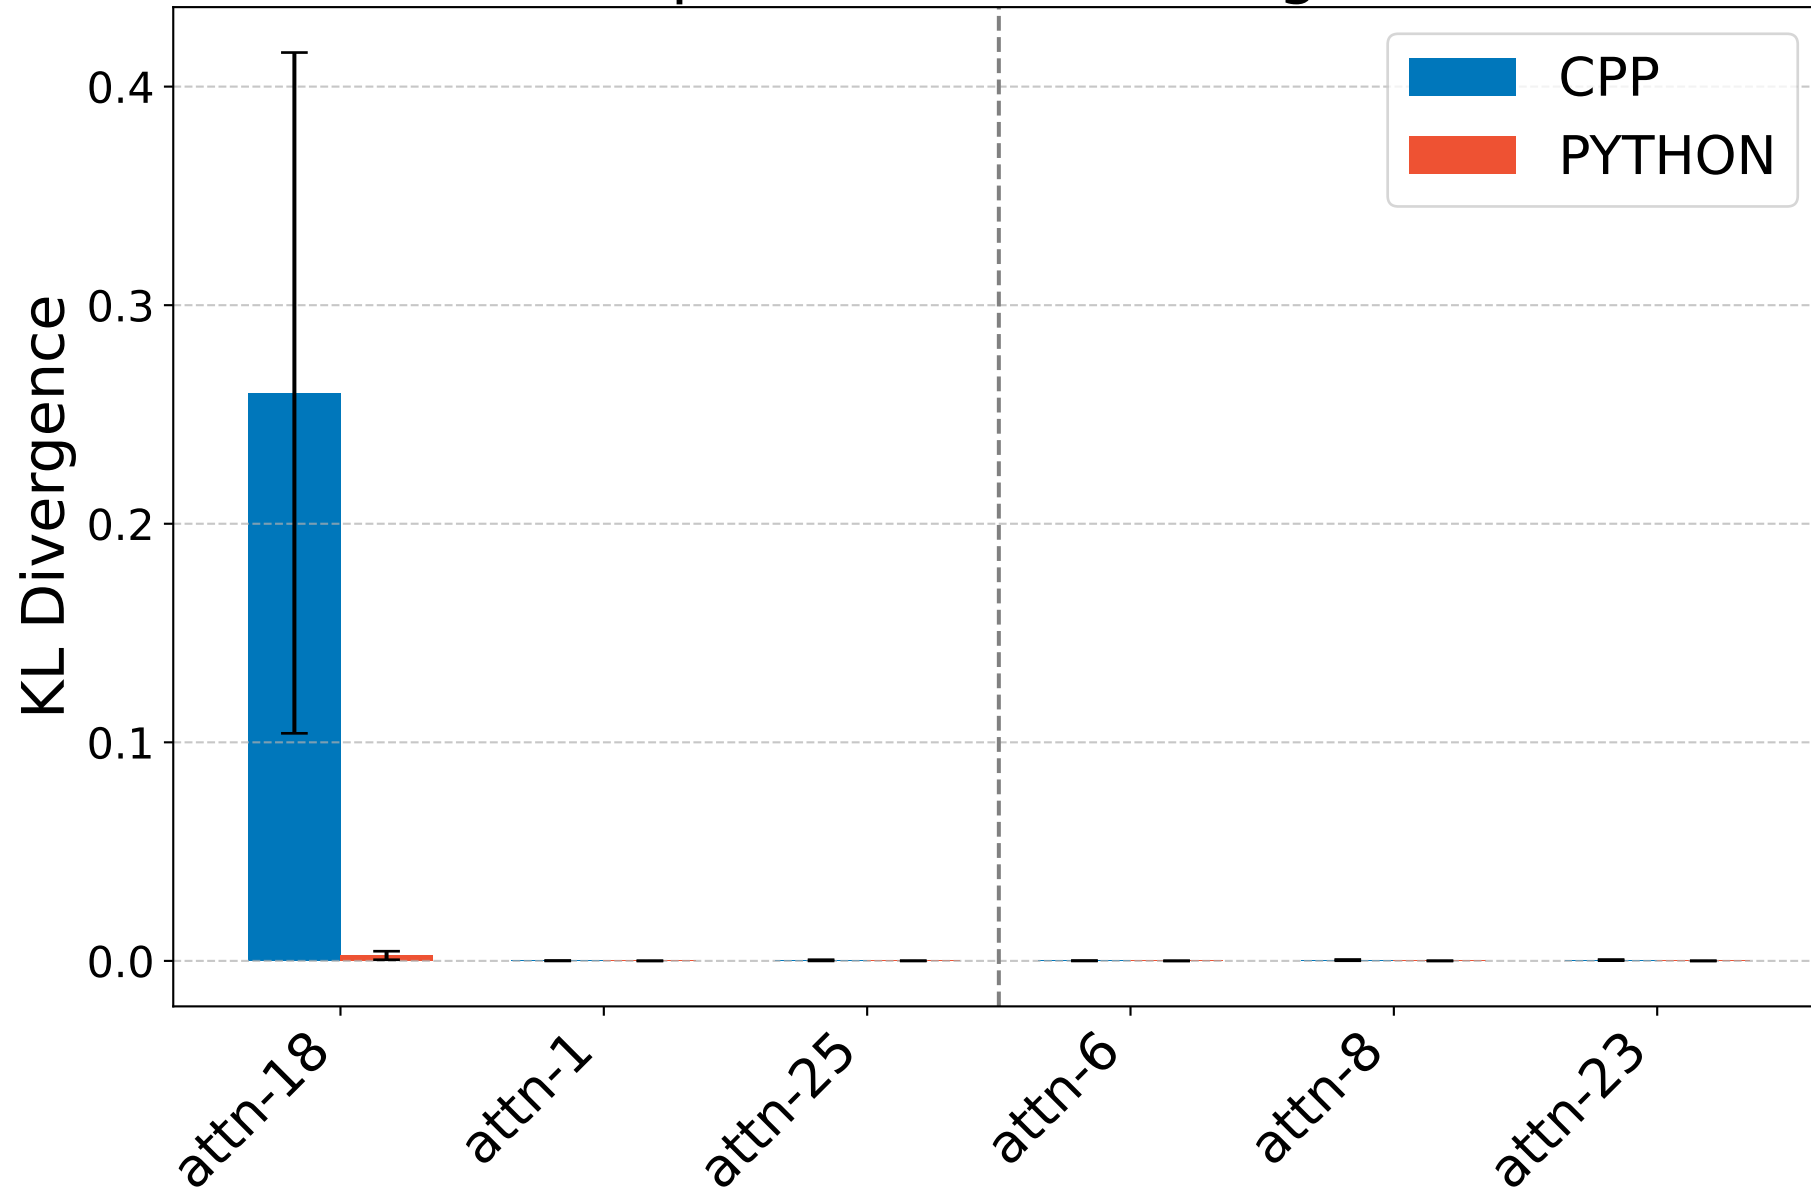

## Top 3 Layers by Delta Bias Difference

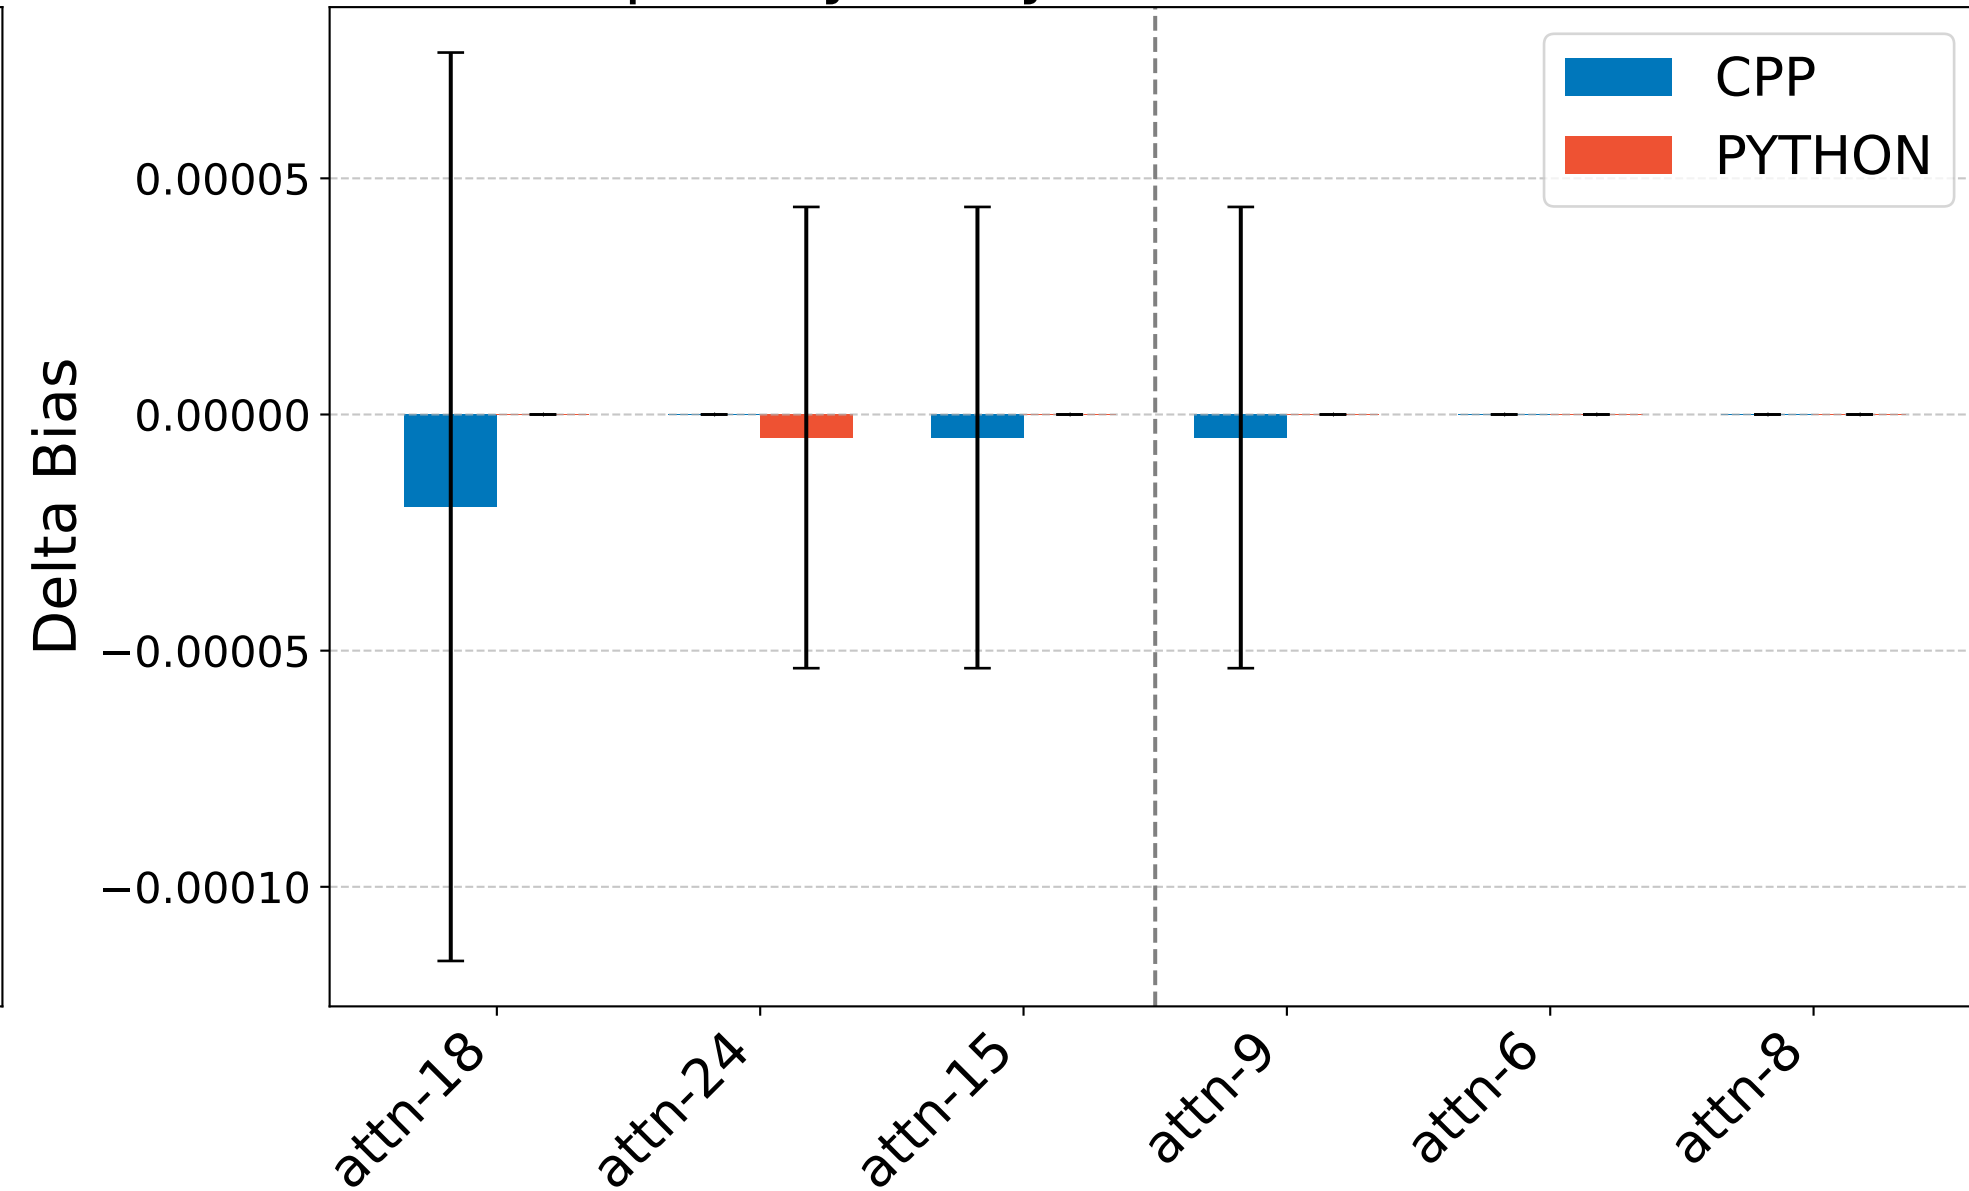

Supplement: supplementary_material [file attn_comparison.pdf › layer_domain_control-main/causal_intervention/graphs/gemma_1b/graphs/attn_comparison.pdf]

# GEMMA\_1B - MLP Layer Analysis

## Comparison of KL Divergence

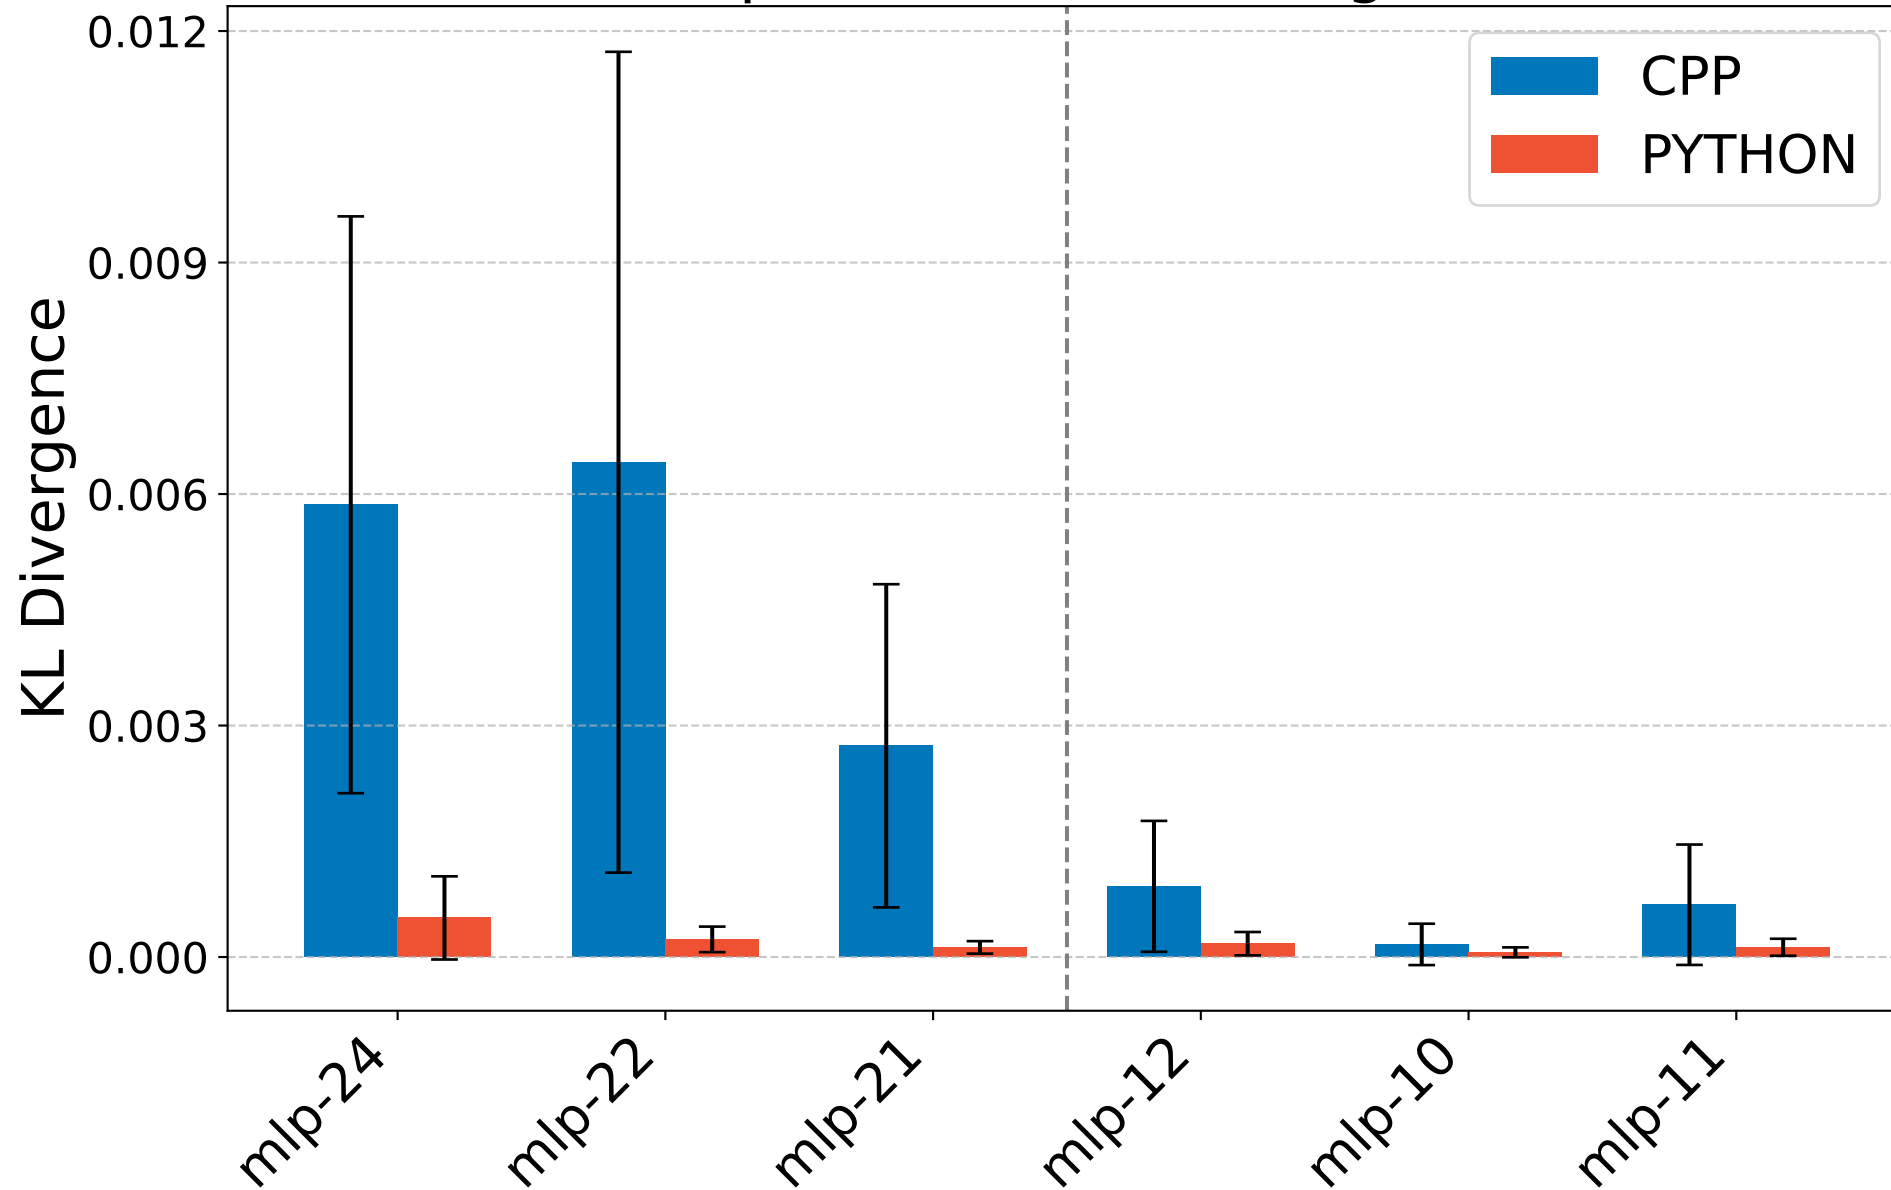

## Top 3 Layers by Delta Bias Difference

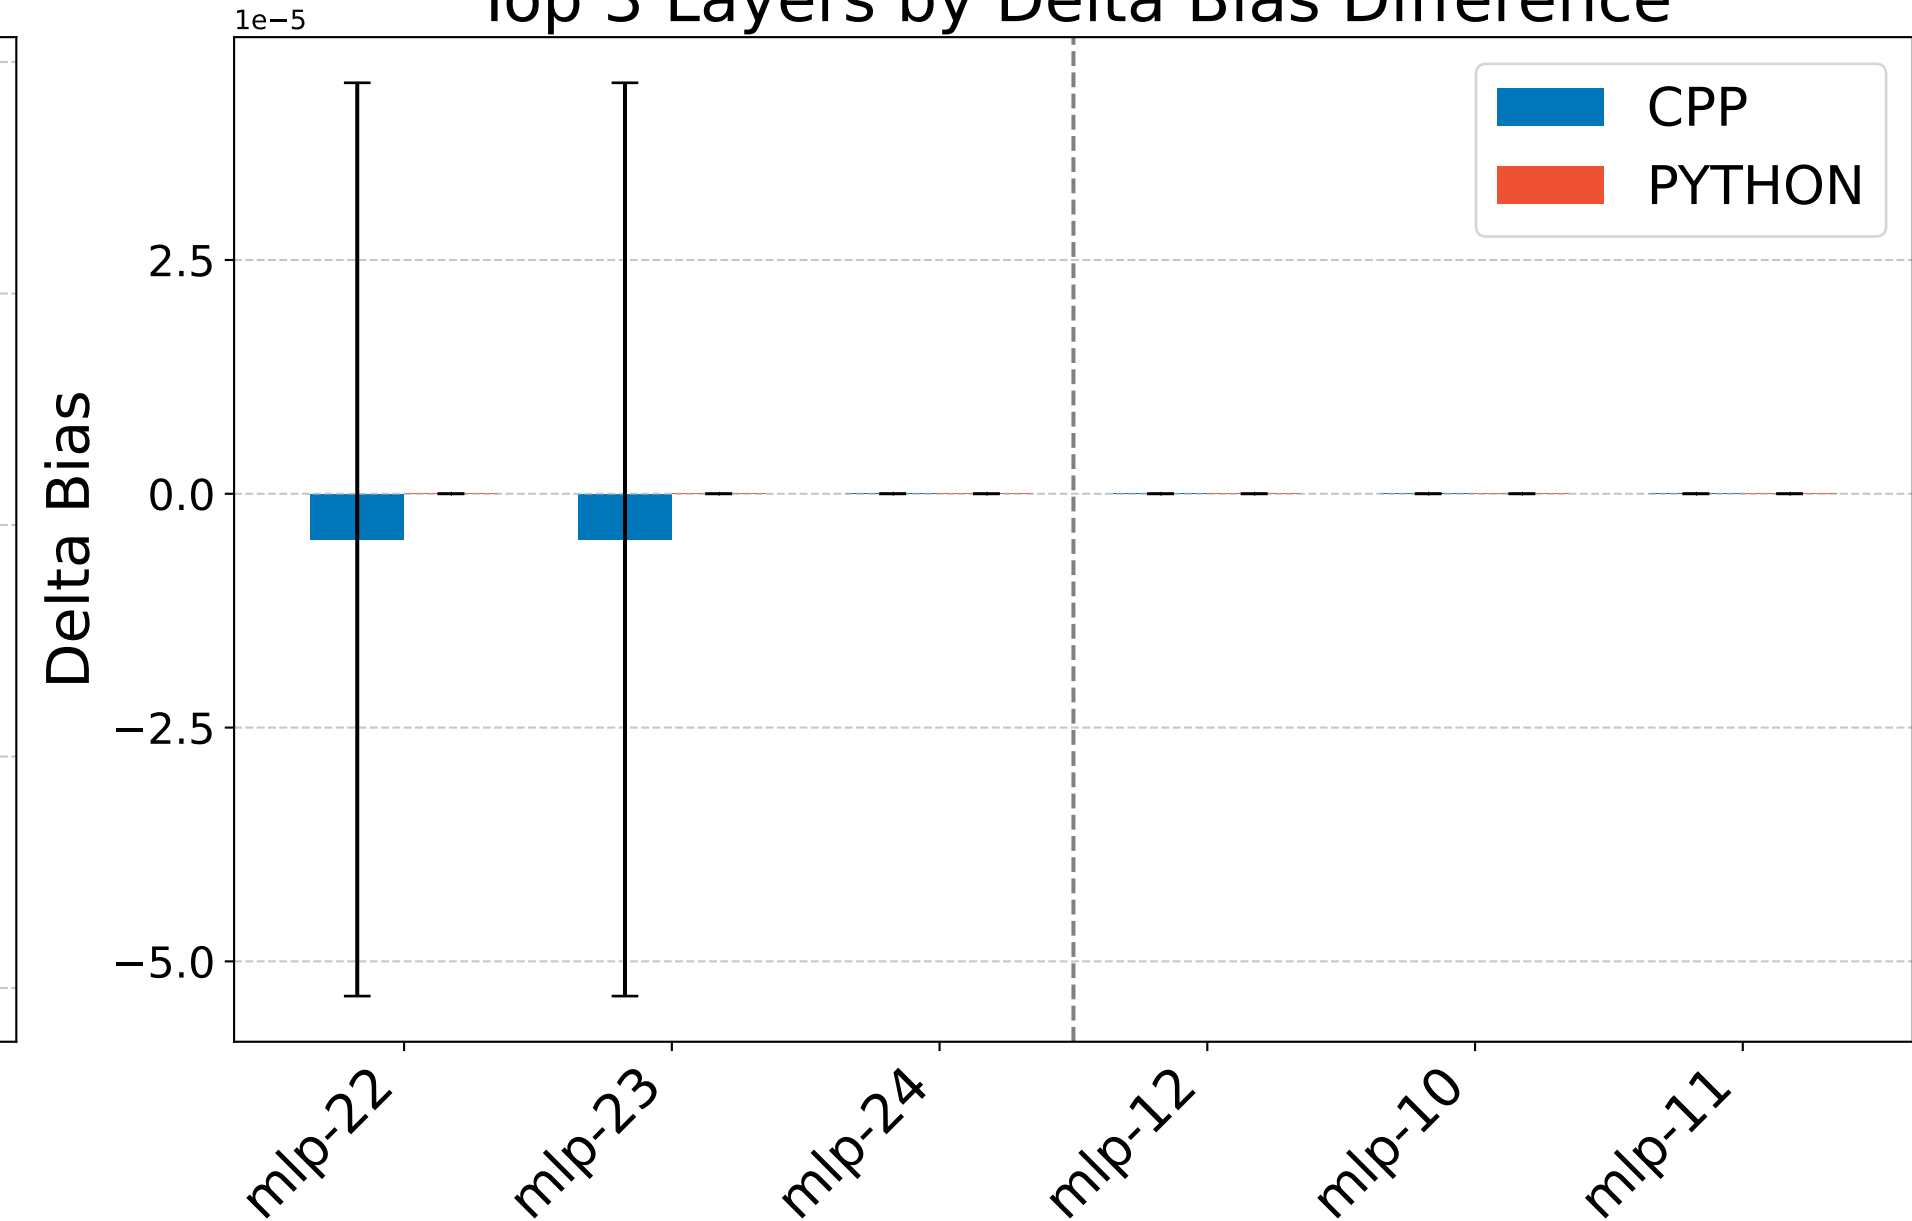

Supplement: supplementary_material [file mlp_comparison.pdf › layer_domain_control-main/causal_intervention/graphs/gemma_1b/graphs/mlp_comparison.pdf]

# GEMMA\_4B - ATTN Layer Analysis

## Comparison of KL Divergence

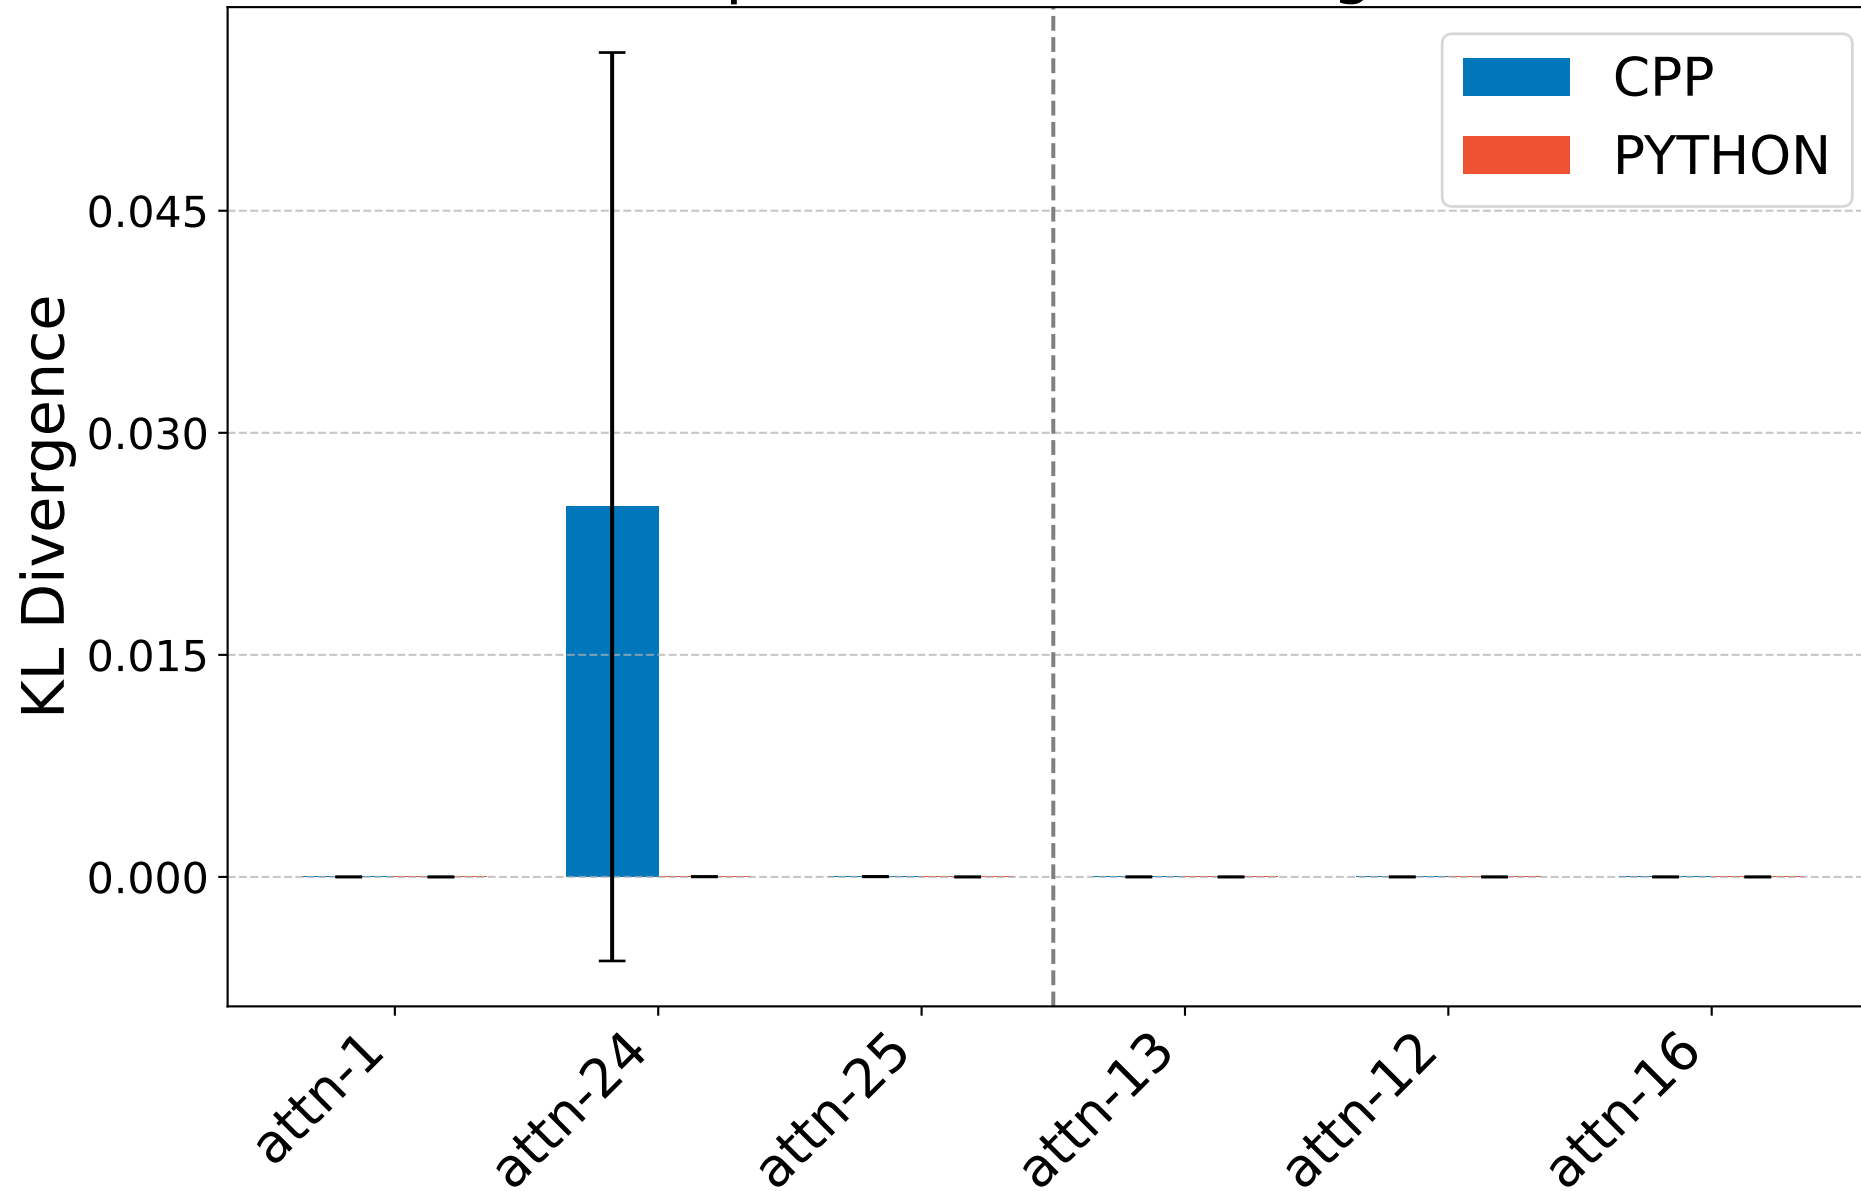

## Top 3 Layers by Delta Bias Difference

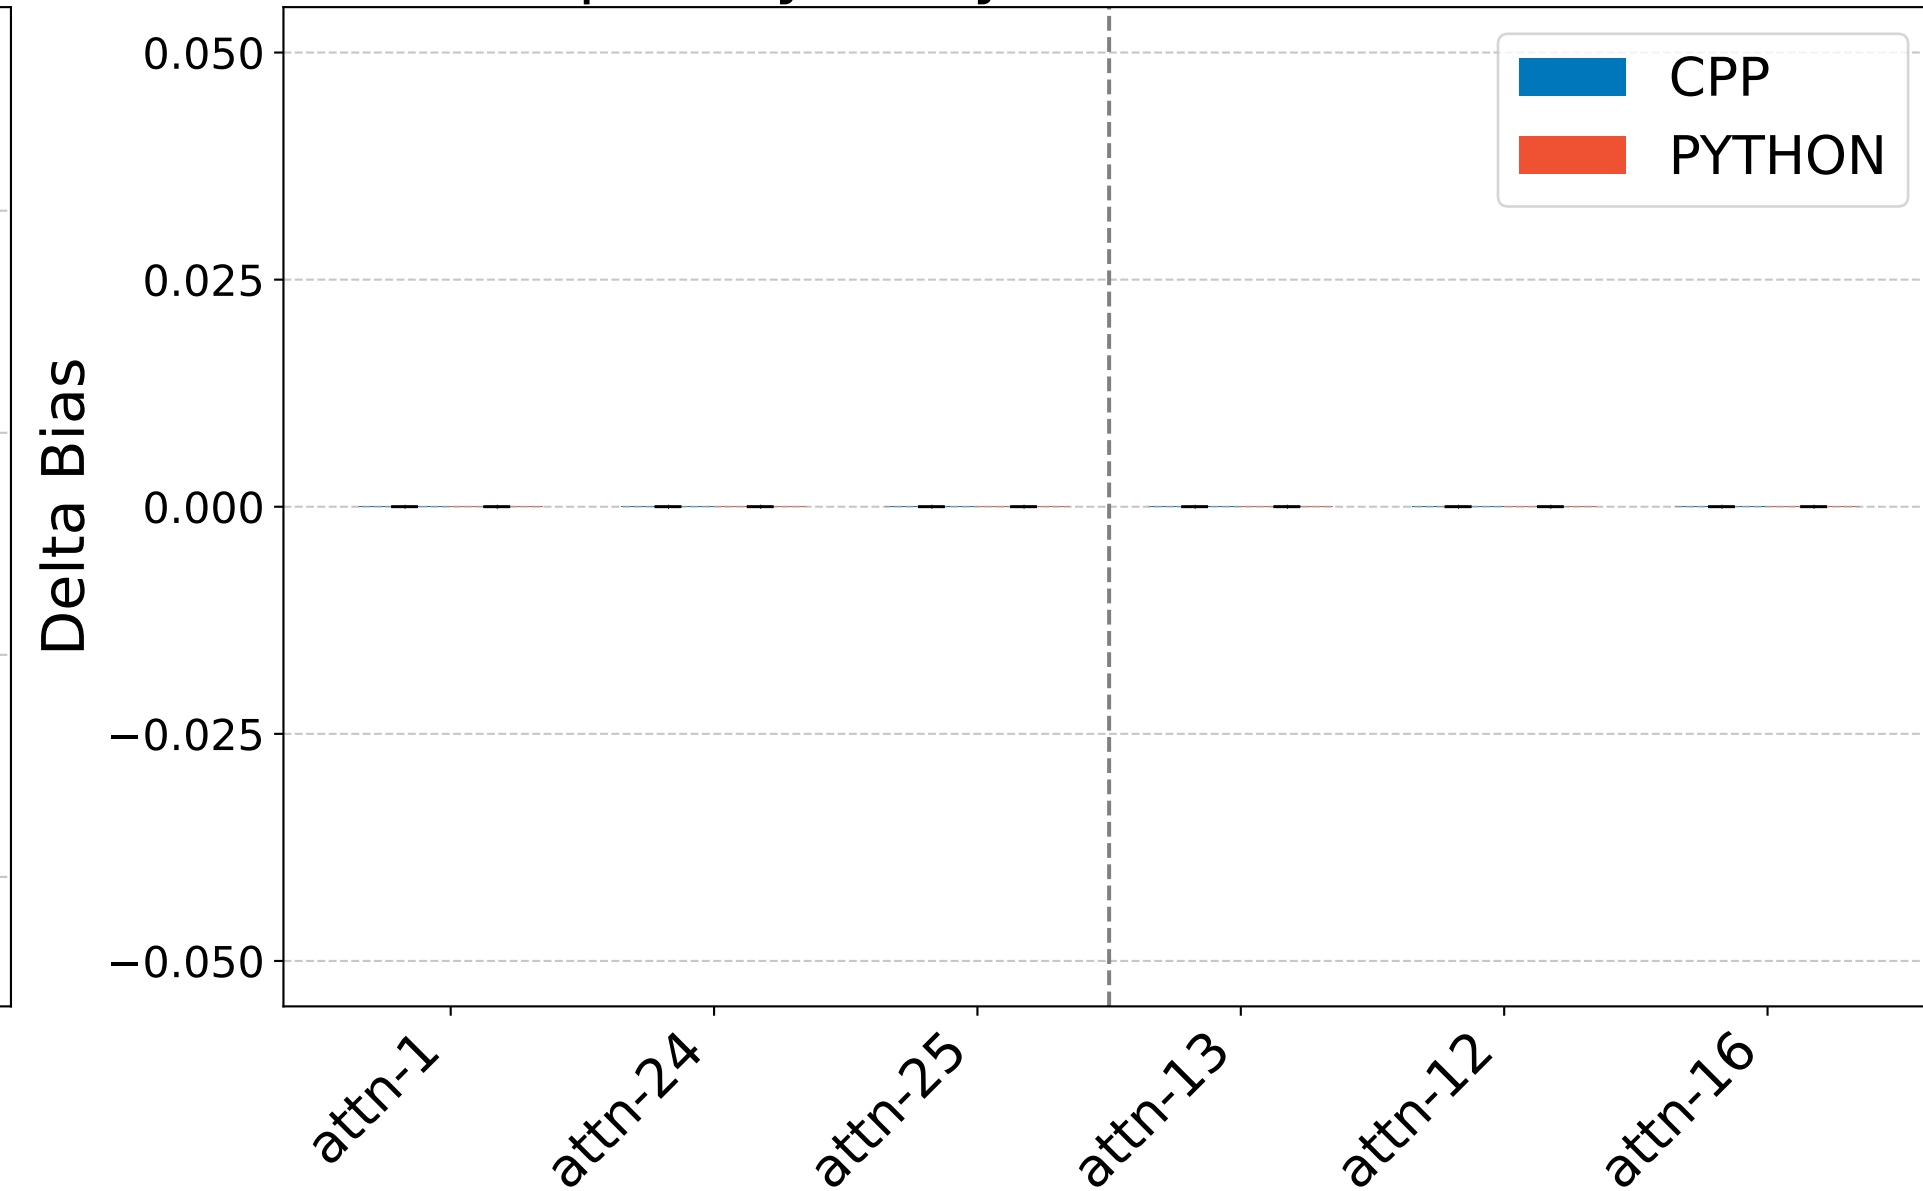

Supplement: supplementary_material [file attn_comparison.pdf › layer_domain_control-main/causal_intervention/graphs/gemma_4b/graphs/attn_comparison.pdf]

# GEMMA\_4B - MLP Layer Analysis

## Comparison of KL Divergence

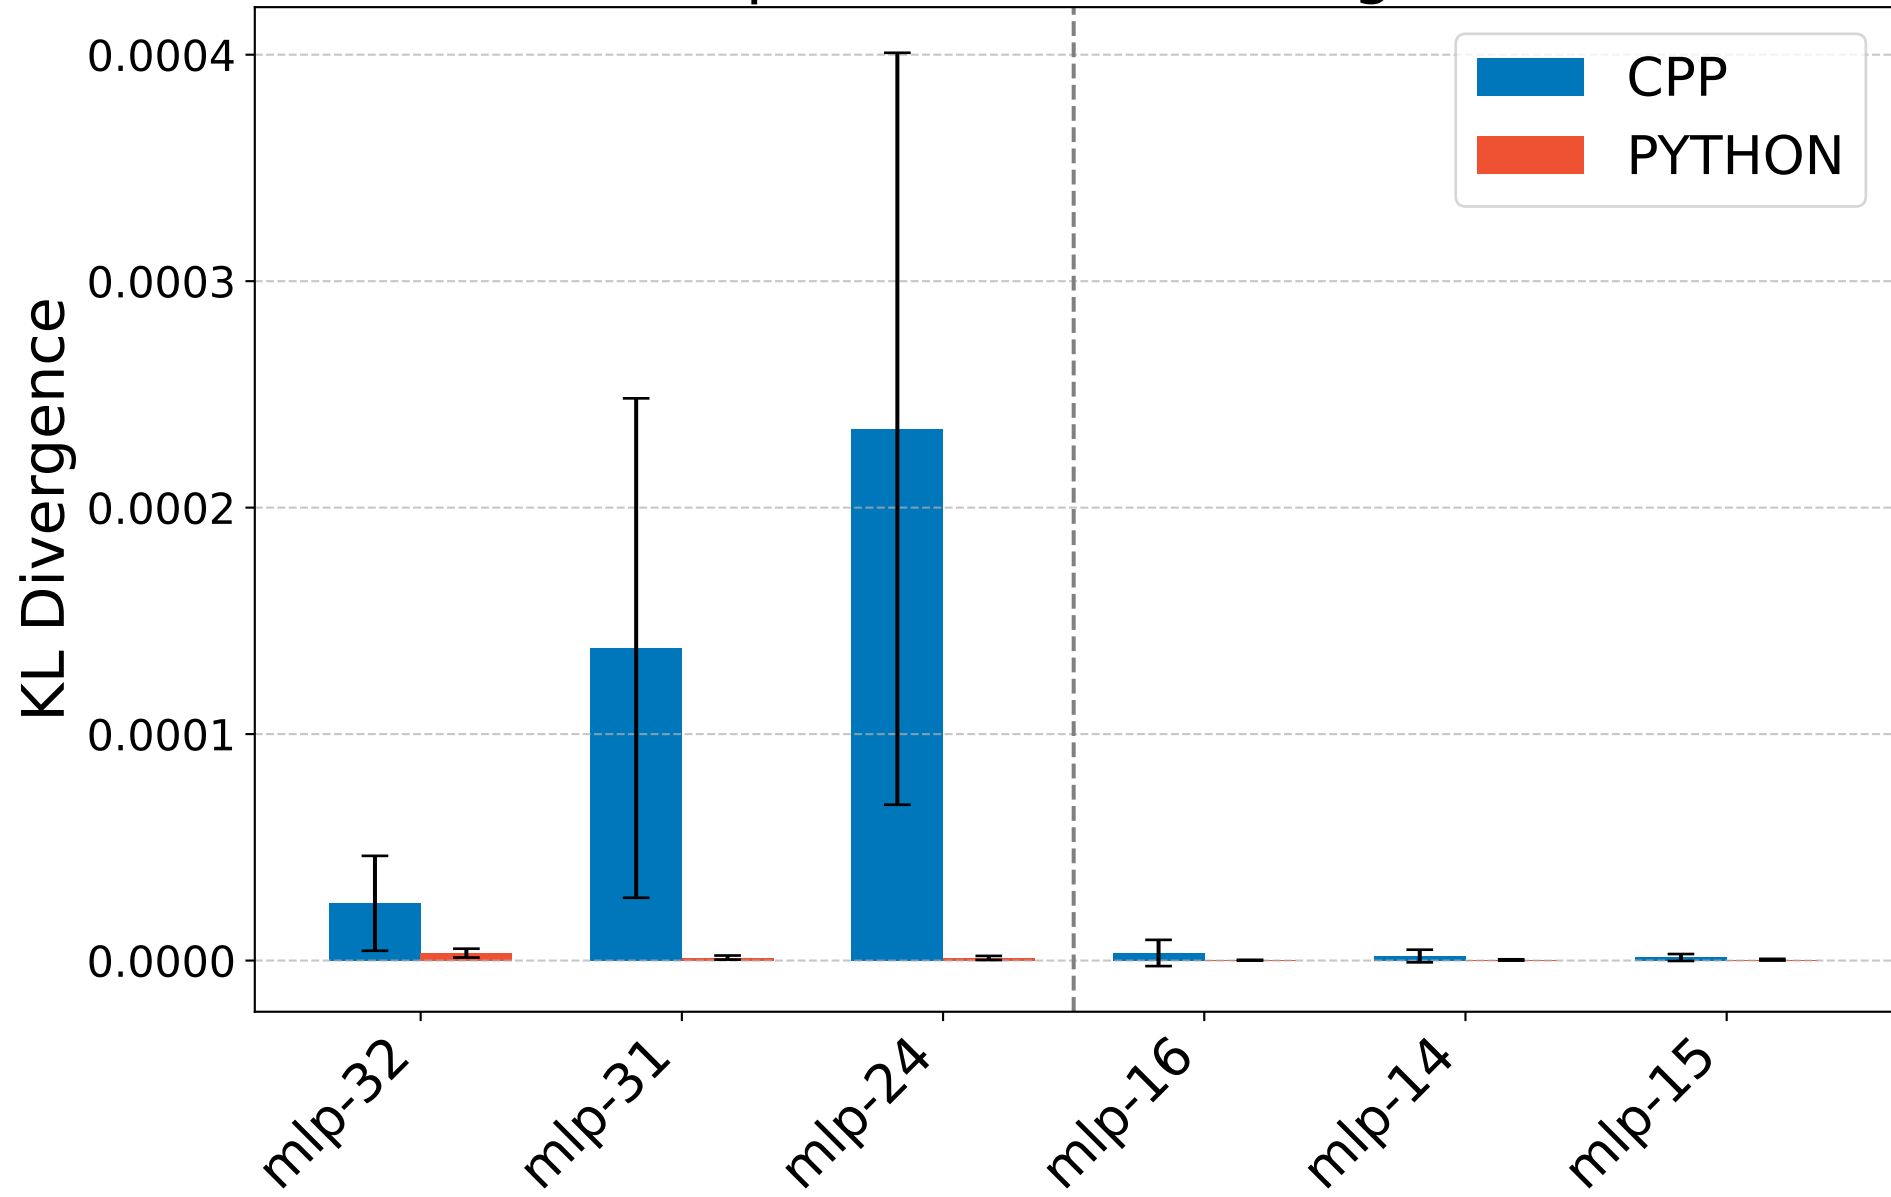

## Top 3 Layers by Delta Bias Difference

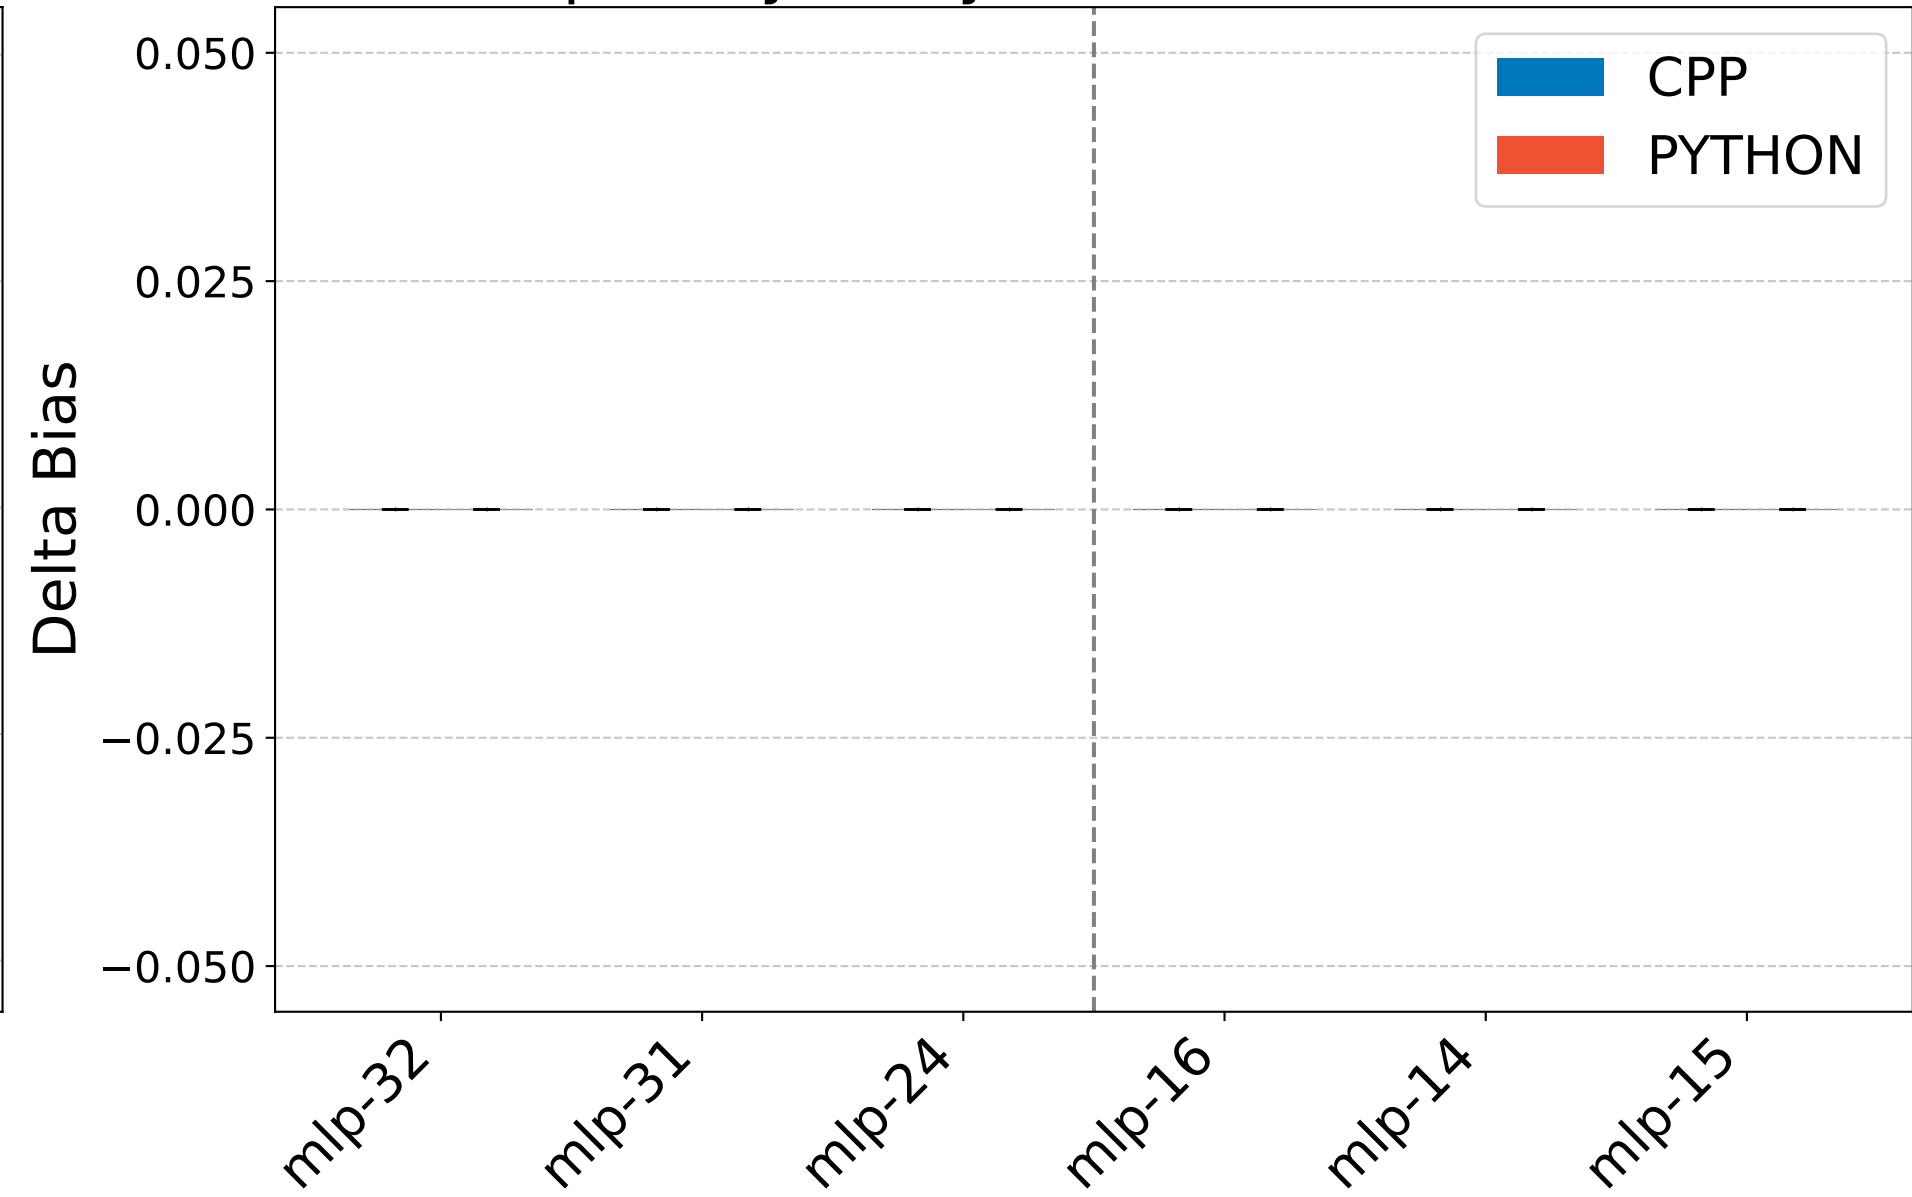

Supplement: supplementary_material [file mlp_comparison.pdf › layer_domain_control-main/causal_intervention/graphs/gemma_4b/graphs/mlp_comparison.pdf]

# LLAMA\_1B - ATTN Layer Analysis

## Comparison of KL Divergence

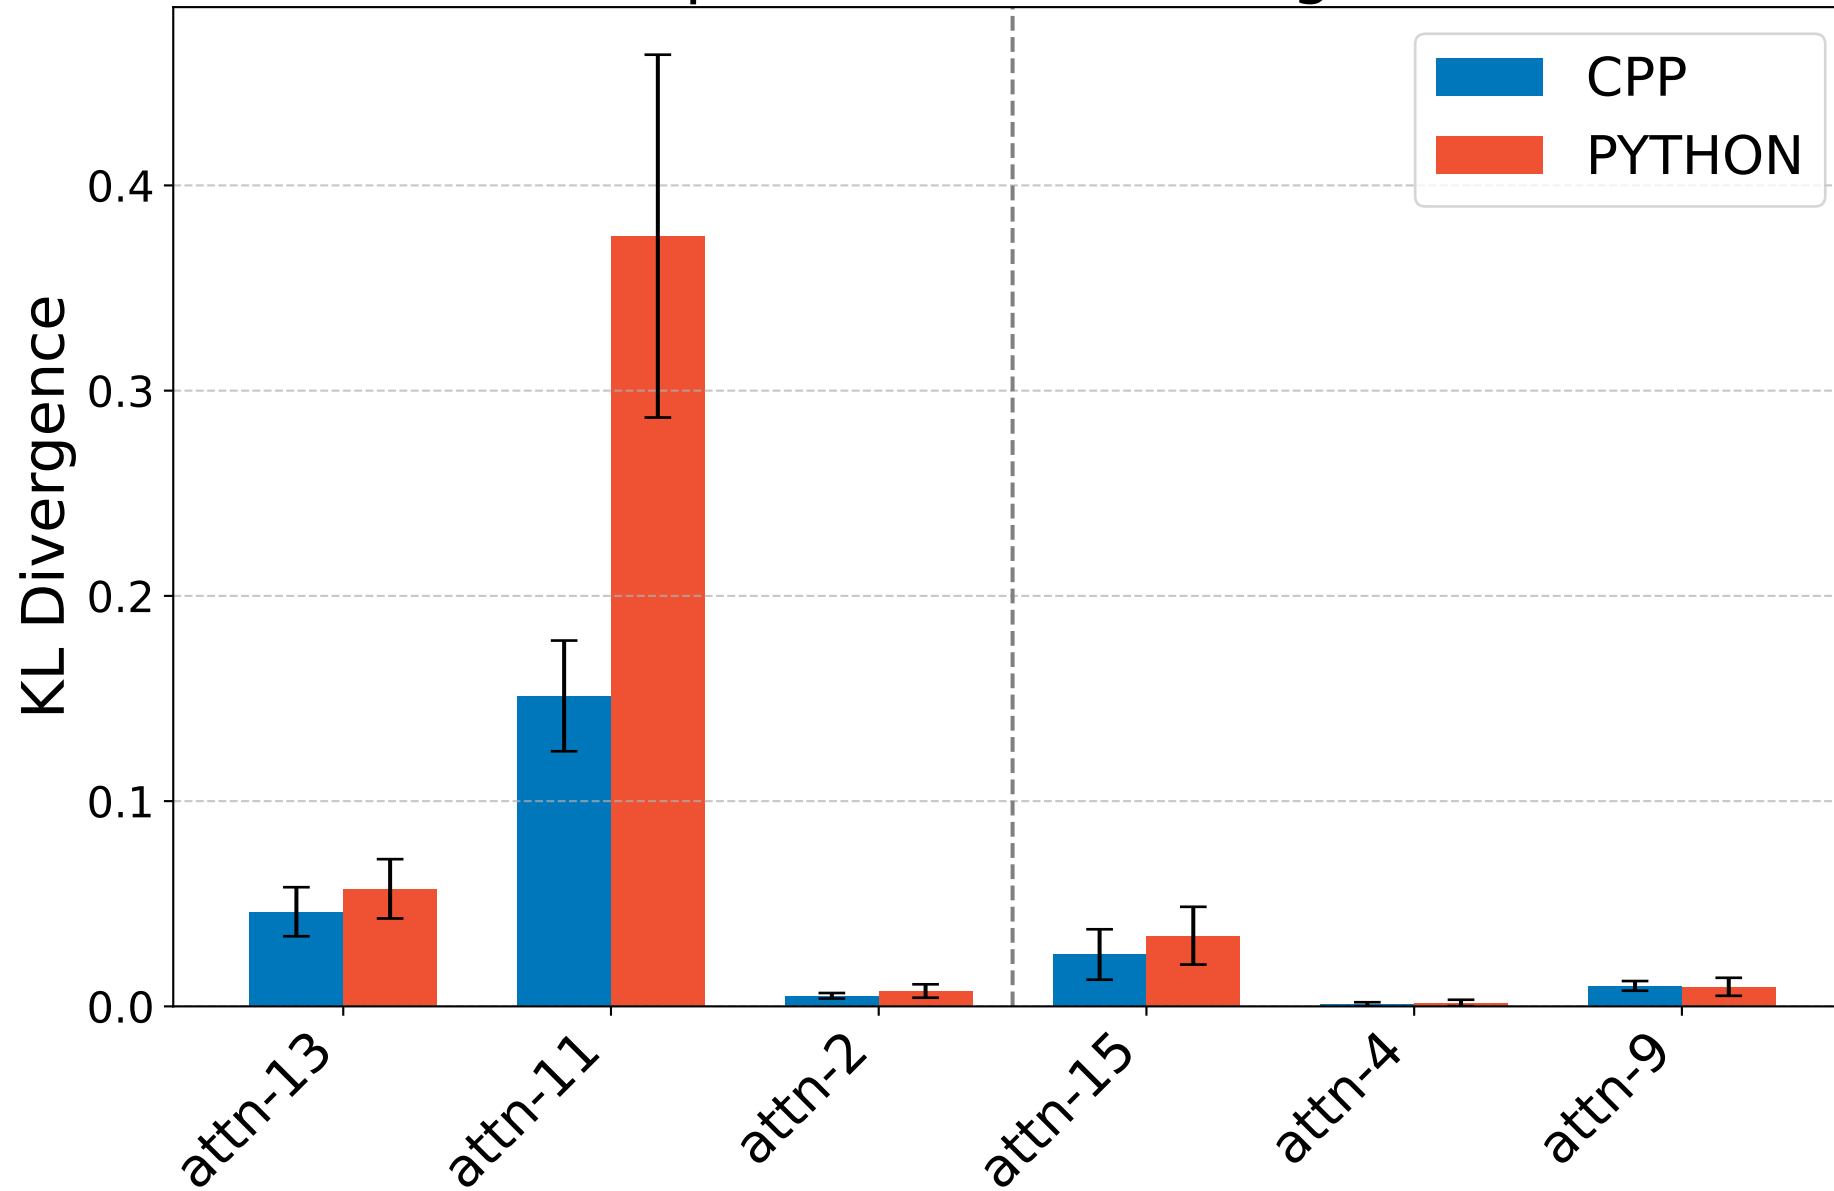

## Top 3 Layers by Delta Bias Difference

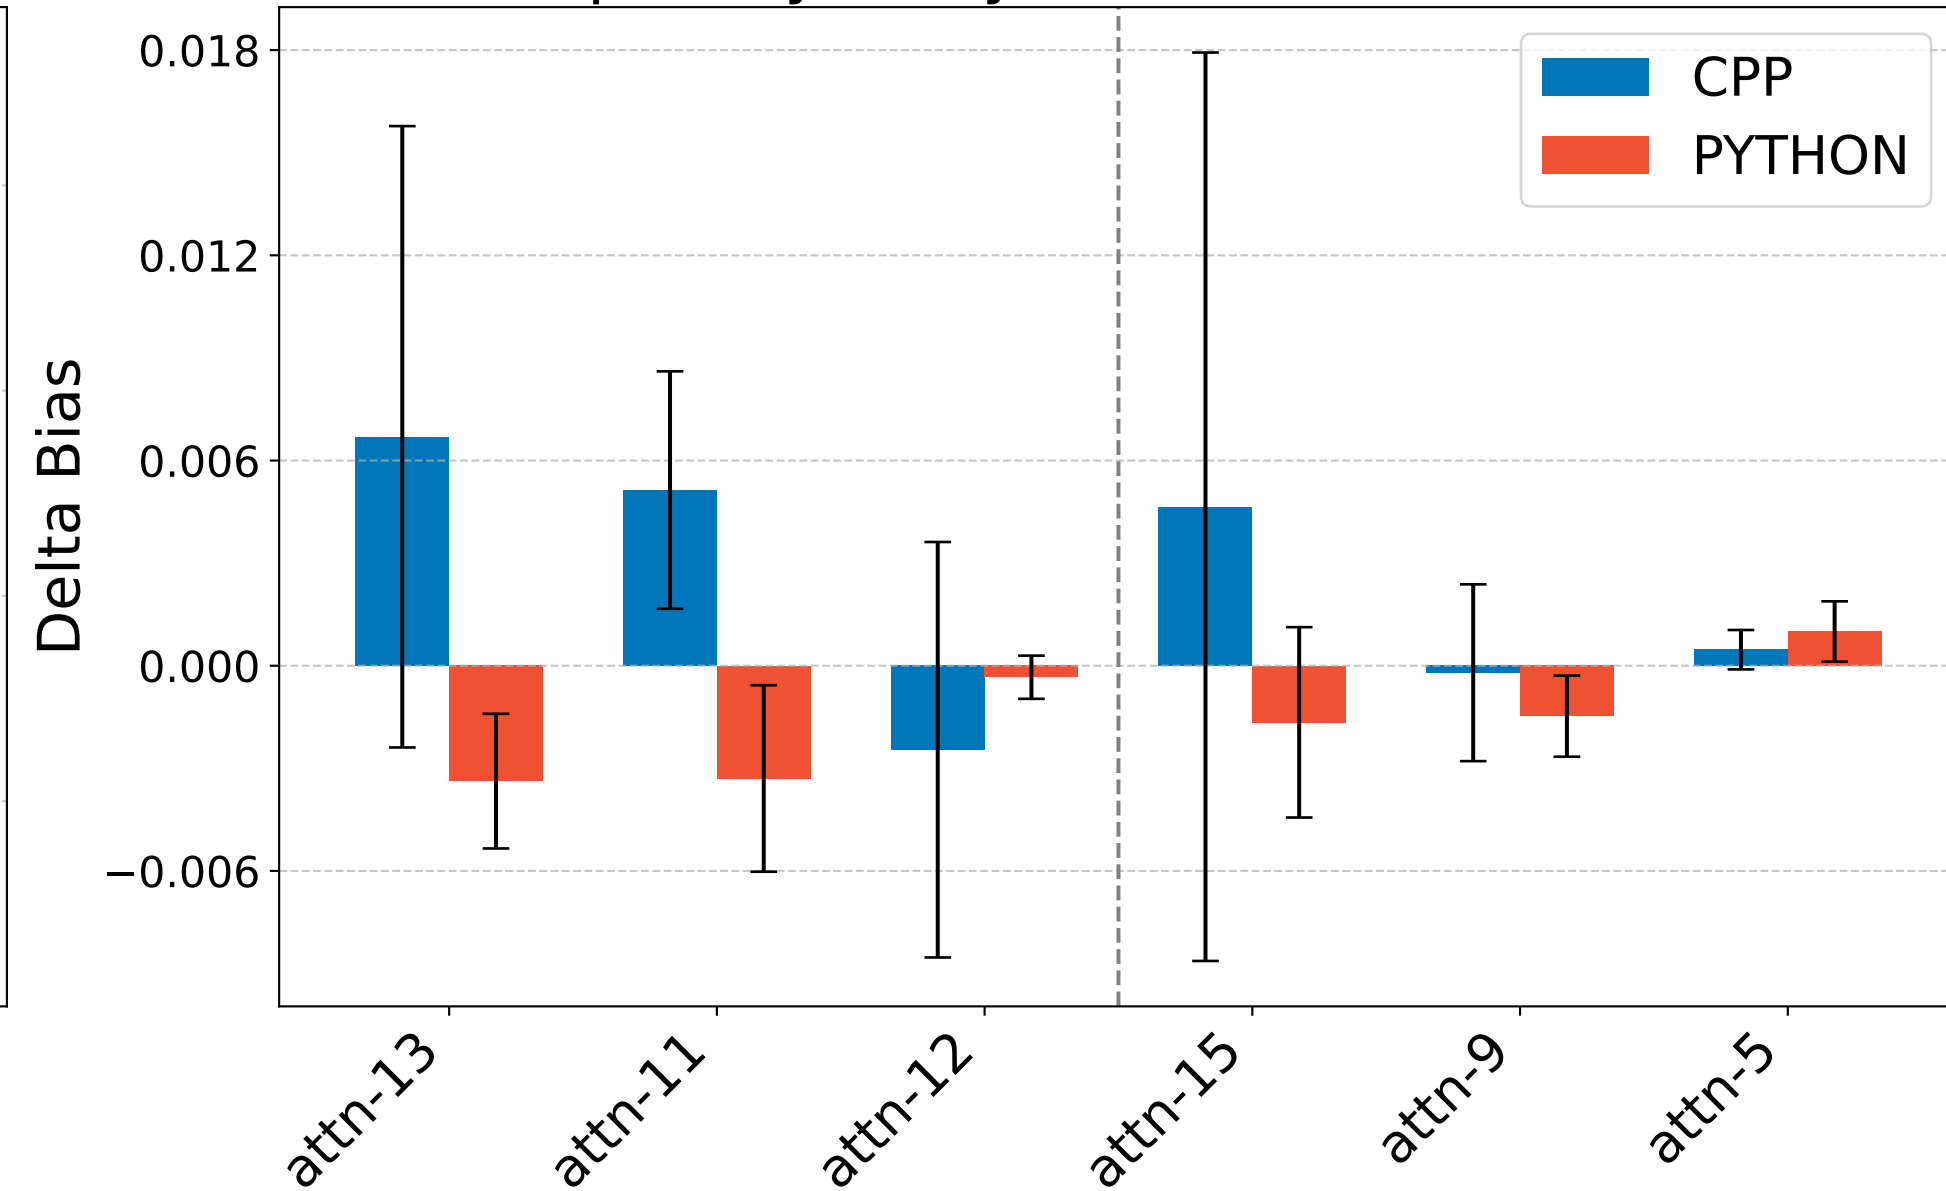

Supplement: supplementary_material [file attn_comparison.pdf › layer_domain_control-main/causal_intervention/graphs/llama_1b/graphs/attn_comparison.pdf]

# LLAMA\_1B - MLP Layer Analysis

## Comparison of KL Divergence

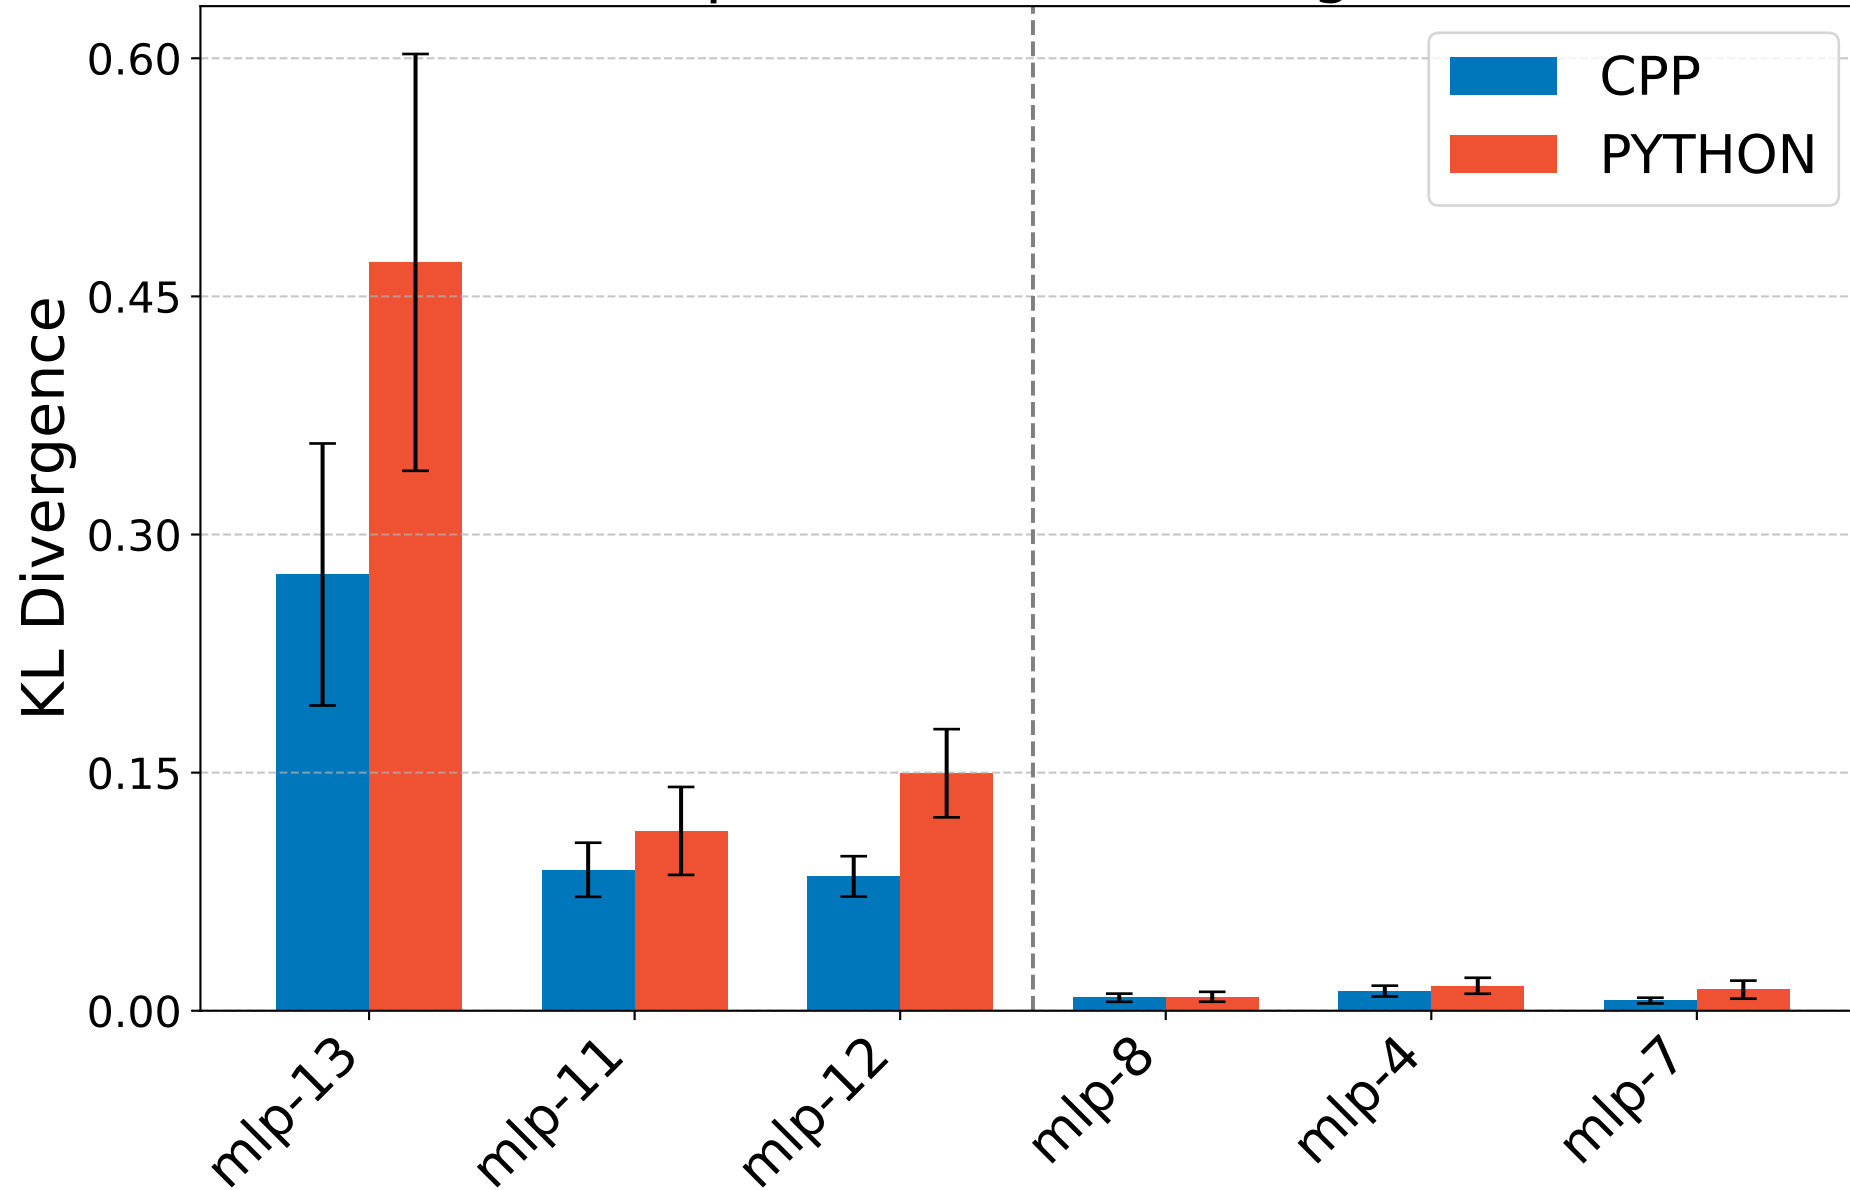

## Top 3 Layers by Delta Bias Difference

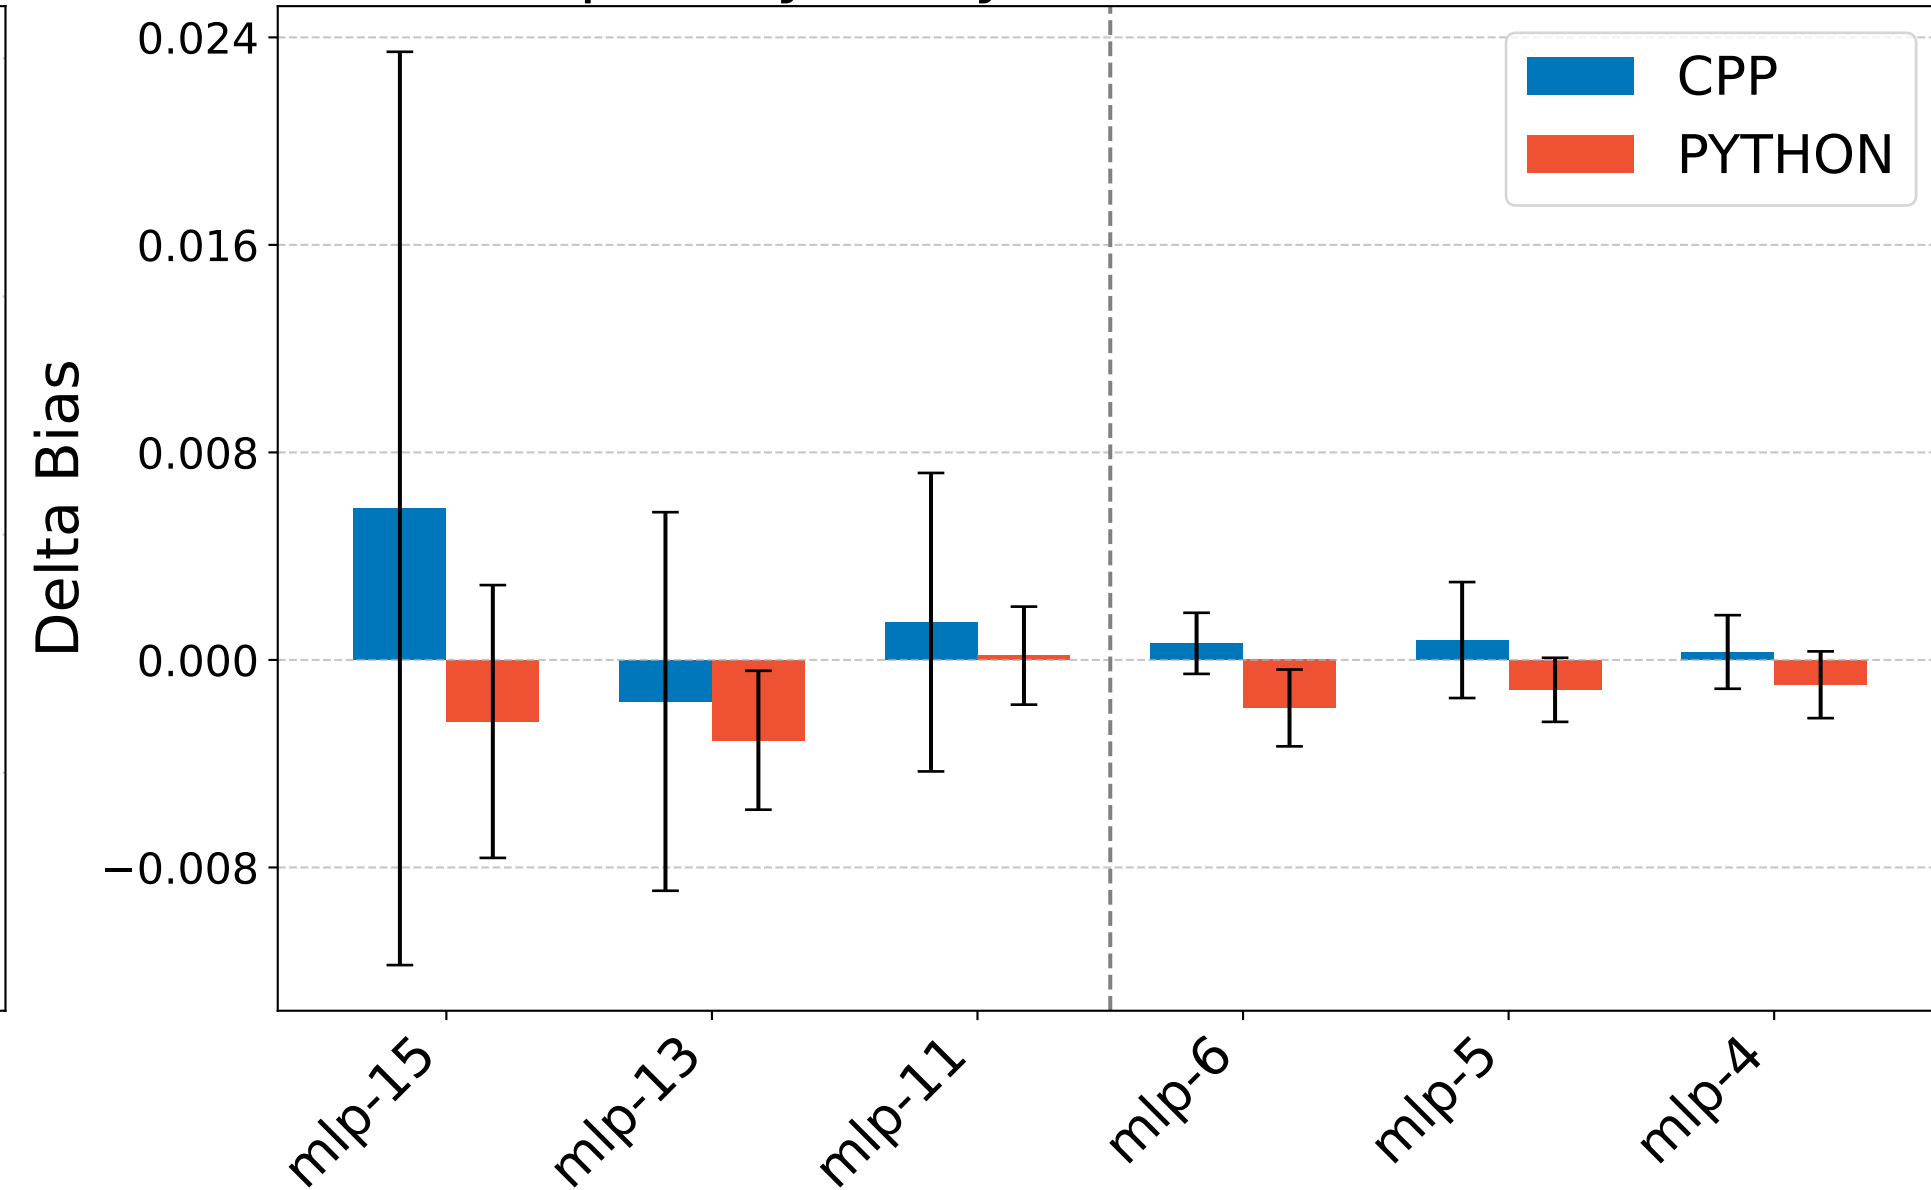

Supplement: supplementary_material [file mlp_comparison.pdf › layer_domain_control-main/causal_intervention/graphs/llama_1b/graphs/mlp_comparison.pdf]

# LLAMA\_3B - ATTN Layer Analysis

## Comparison of KL Divergence

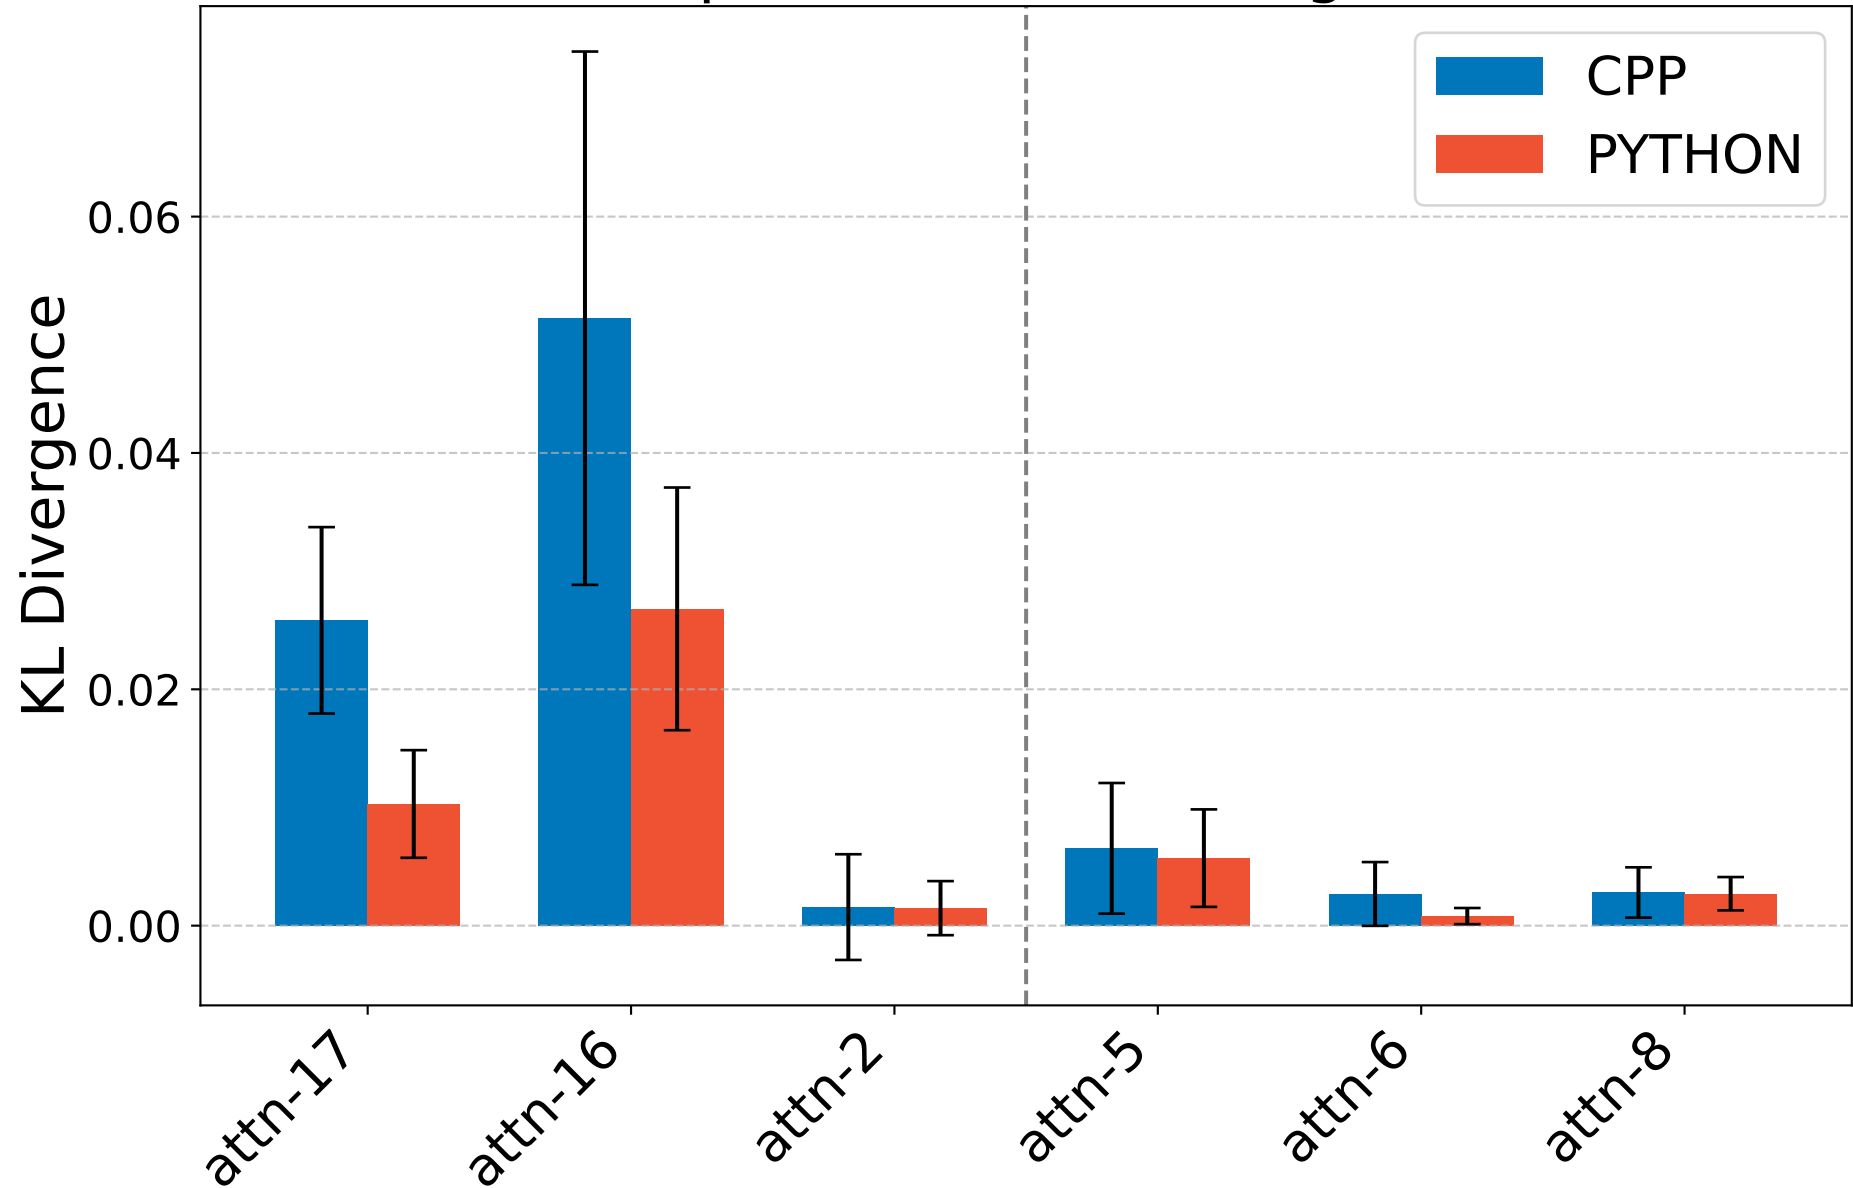

## Top 3 Layers by Delta Bias Difference

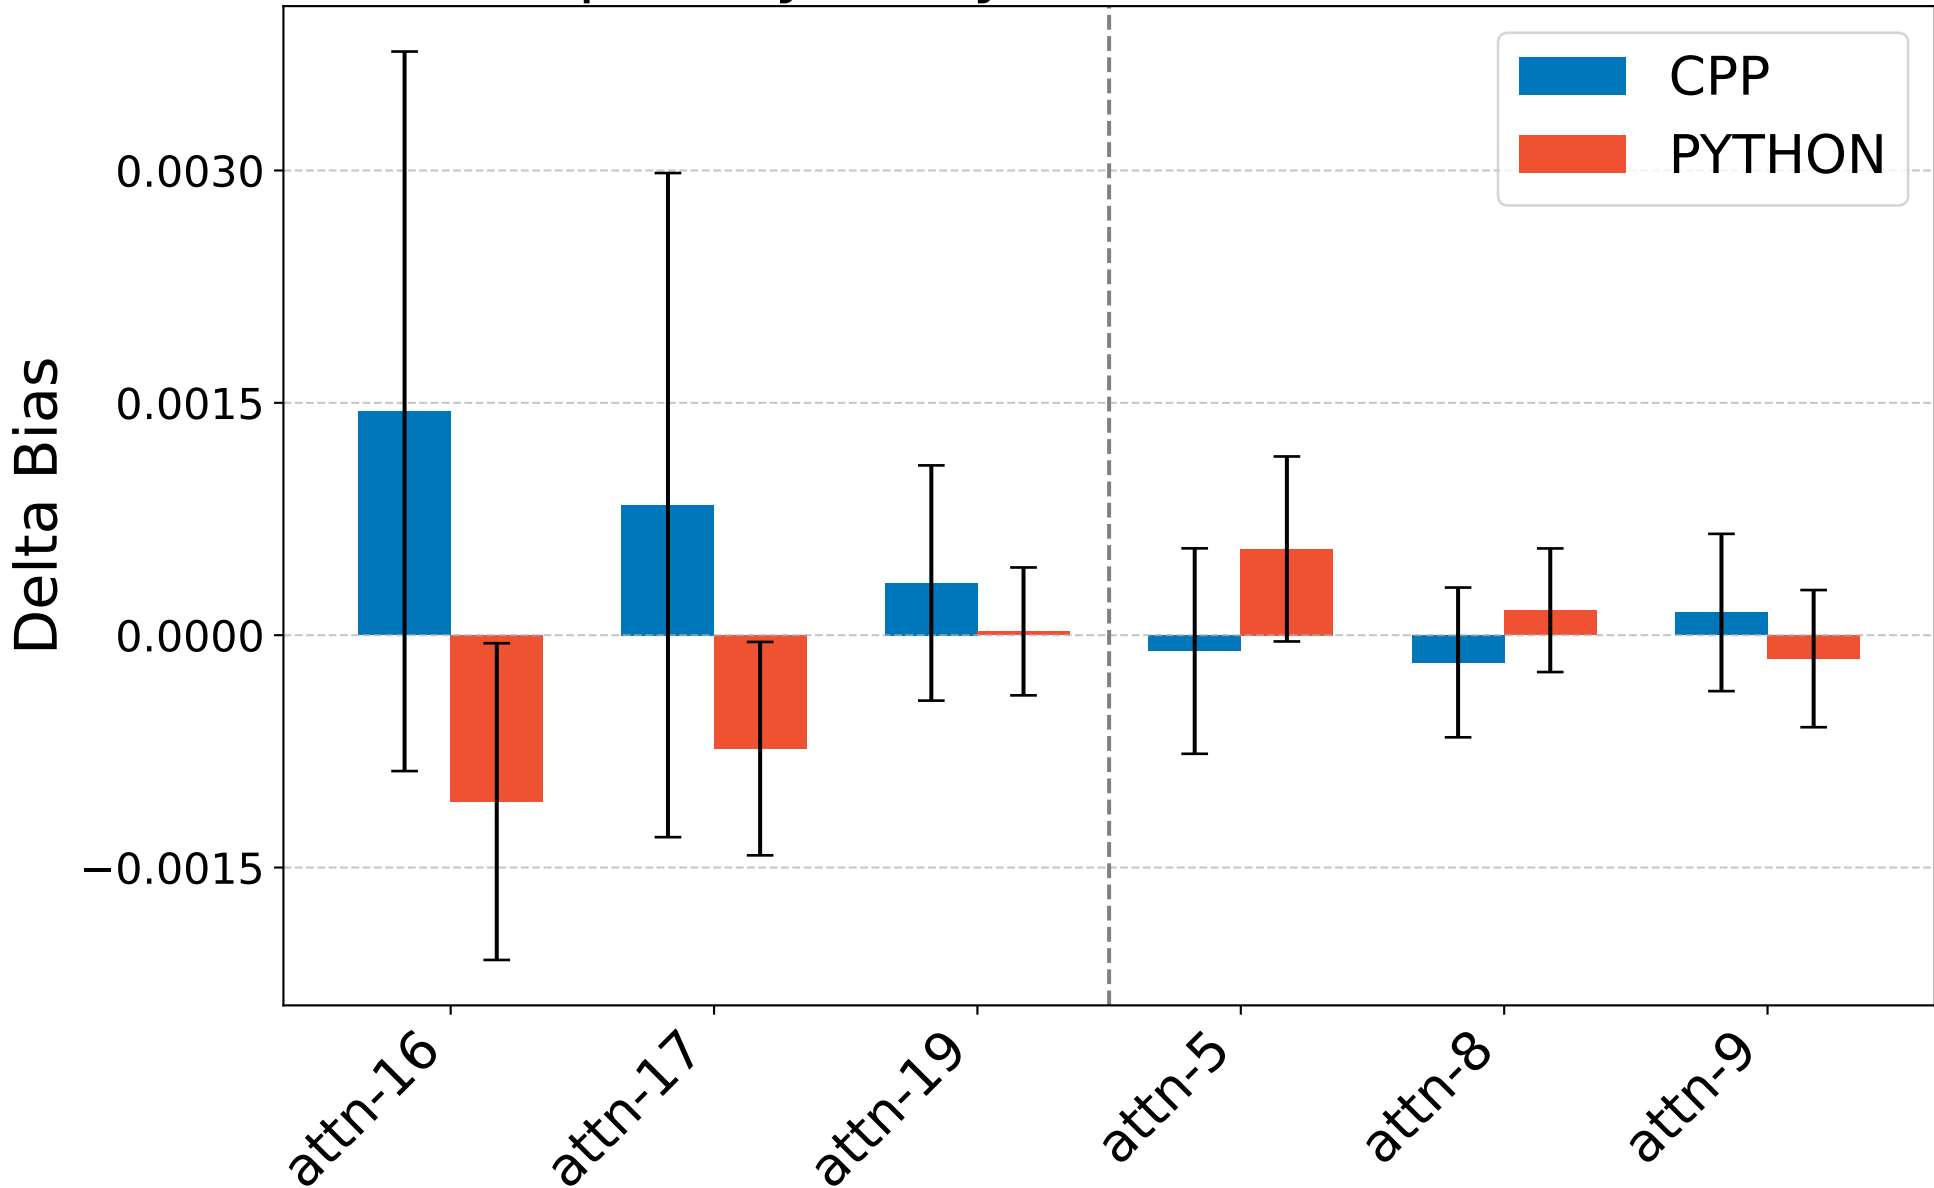

Supplement: supplementary_material [file attn_comparison.pdf › layer_domain_control-main/causal_intervention/graphs/llama_3b/graphs/attn_comparison.pdf]

# LLAMA\_3B - MLP Layer Analysis

## Comparison of KL Divergence

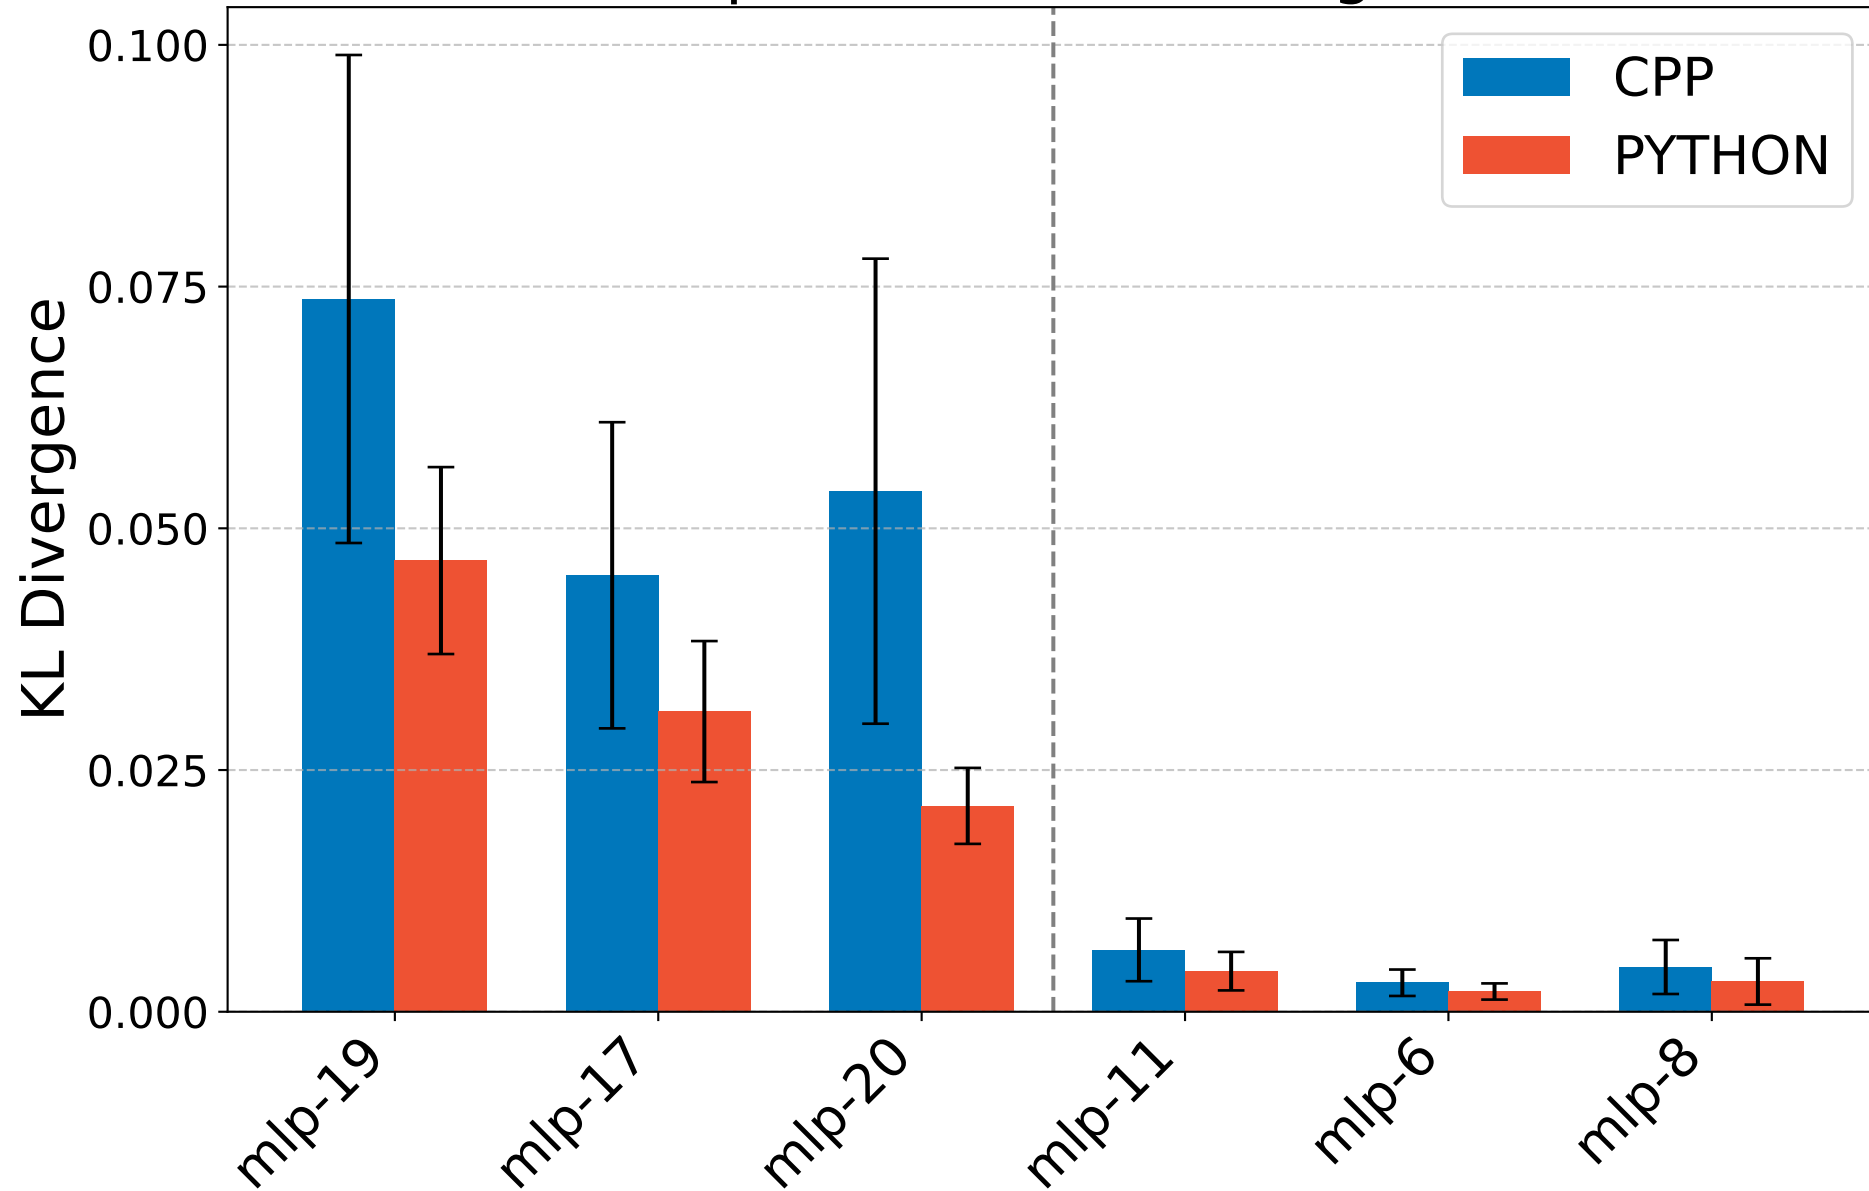

## Top 3 Layers by Delta Bias Difference

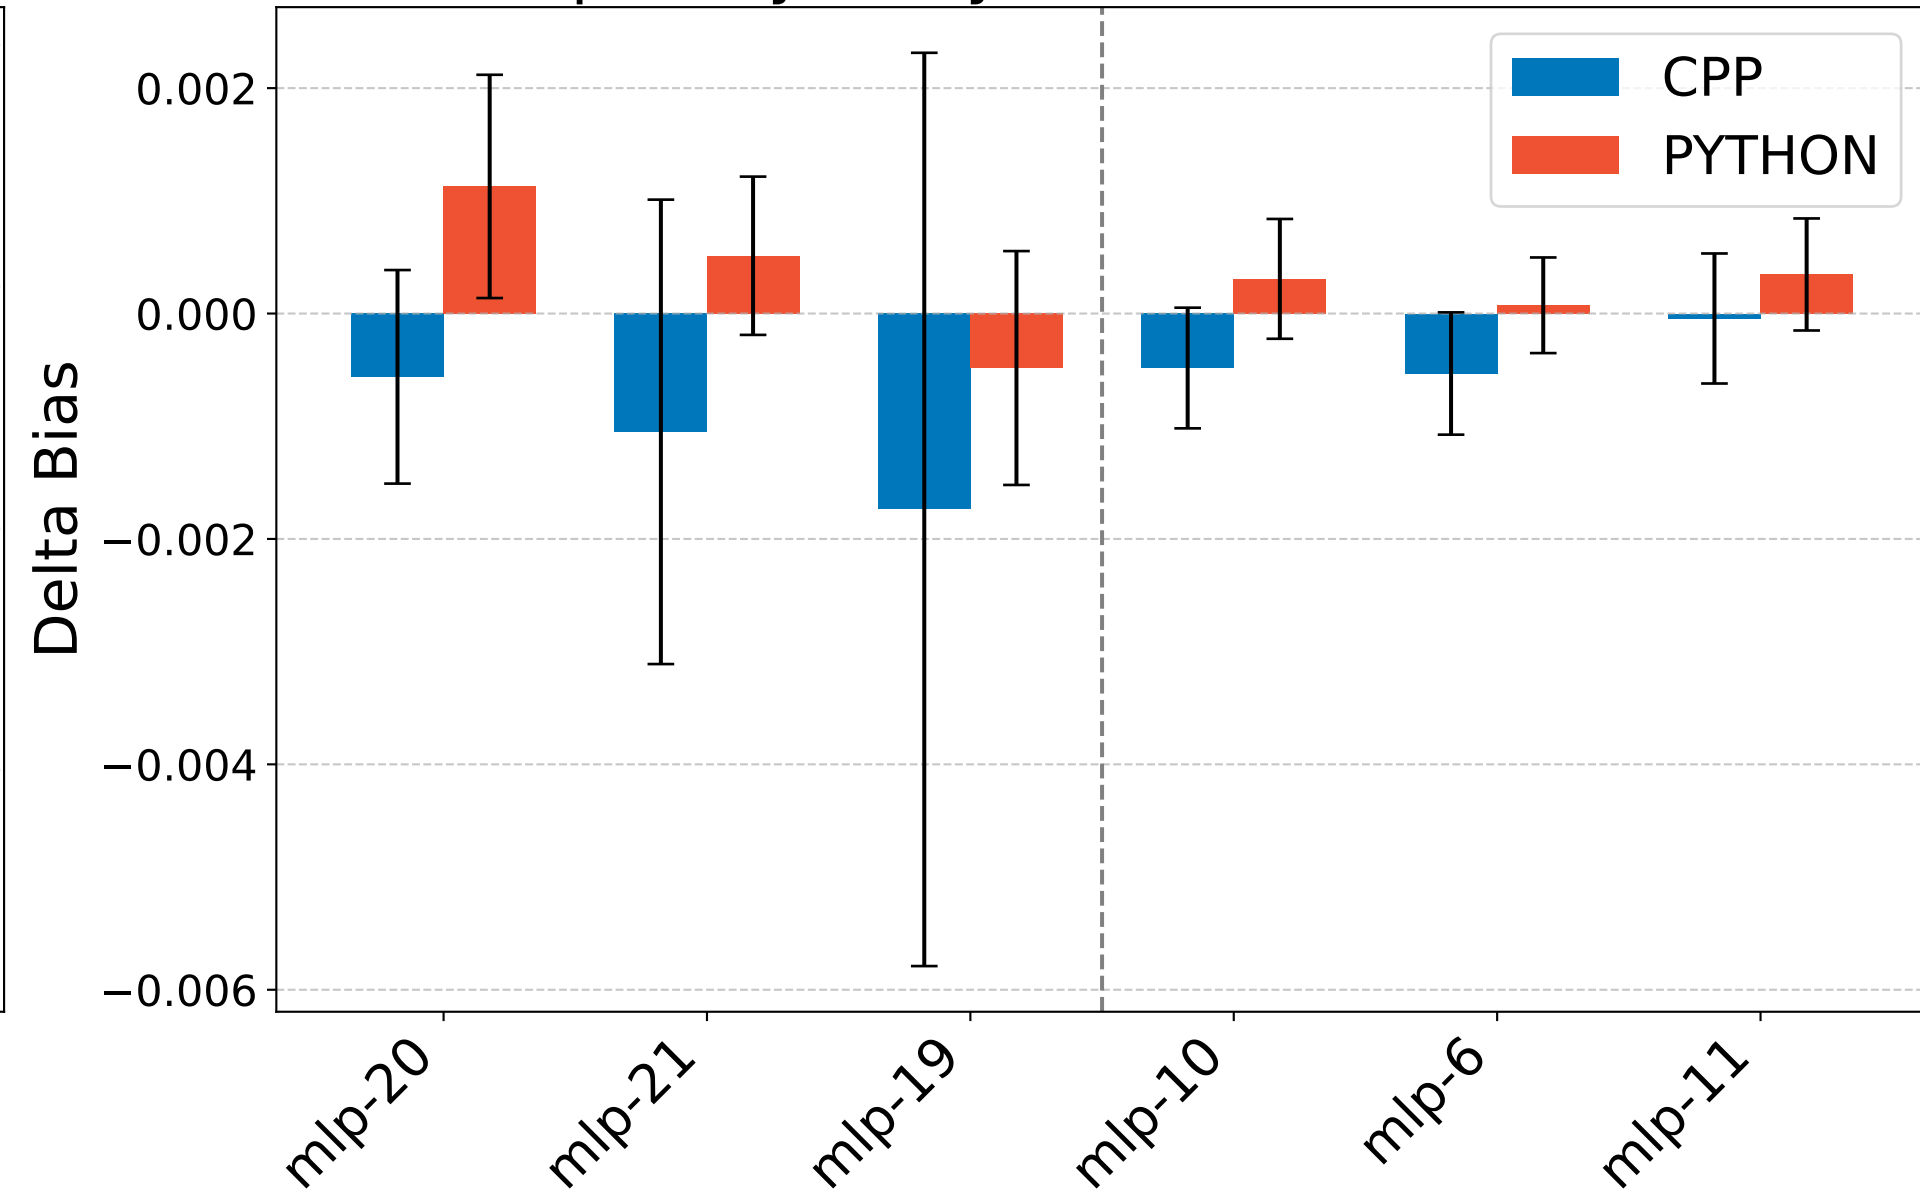

Supplement: supplementary_material [file mlp_comparison.pdf › layer_domain_control-main/causal_intervention/graphs/llama_3b/graphs/mlp_comparison.pdf]
